# Supplementary material for: Atomistic characterization of hydration-dependent fuel cell ionomer nanostructure: validation by vibrational spectroscopy
Source: Royal Society of Chemistry journal article supplement (doi:10.1039/d5ta03973h), 2025-01-01
Supplement: d5ta03973h11.xlsx [file d5ta03973h11.xlsx]

## Sheet: Sheet A
	Last frame (2 ns) of simulation used for analysis
			l = 0	l = 1	l = 2	l = 3	l = 5	l = 7	l = 10	l = 15	l = 20
	Total #SO3H at 2 ns (Nsa):		320	215	136	80	39	29	22	11	10
		l = 0					l = 1					l = 2
		L	fL	fL,a			L	fL	fL,a			L	fL	fL,a
		0	320	320			0	90	87			0	29	24
		Ns or Nsa :	320	320			1	105	76			1	69	44
							2	66	30			2	73	36
							3	39	15			3	78	24
							4	18	6			4	41	7
							5	2	1			5	18	1
							Ns or Nsa :	320	215			6	6	0
												7	5	0
												8	1	0
												Ns or Nsa :	320	136
		l = 3					l = 5					l = 7
		L	fL	fL,a			L	fL	fL,a			L	fL	fL,a
		0	5	5			0	0	0			0	0	0
		1	23	14			1	2	1			1	0	0
		2	54	17	0.314815		2	14	6			2	2	1
		3	93	29			3	45	6			3	17	4
		4	63	11			4	51	8			4	42	6
		5	47	3			5	81	13			5	59	7
		6	23	1			6	61	2			6	65	7
		7	7	0			7	40	2			7	59	3
		8	3	0			8	20	1			8	44	0
		9	2	0			9	4	0			9	22	1
		Ns or Nsa :	320	80			10	1	0			10	9	0
							11	1	0			11	1	0
							Ns or Nsa :	320	39			Ns or Nsa :	320	29
		l = 10					l = 15					l = 20
		L	fL	fL,a			L	fL	fL,a			L	fL	fL,a
		0	0	0			0	0	0			0	0	0
		1	0	0			1	0	0			1	0	0
		2	0	0			2	0	0			2	0	0
		3	1	0			3	0	0			3	0	0
		4	7	2			4	0	0			4	0	0
		5	17	4			5	3	0			5	0	0
		6	40	3			6	7	1			6	0	0
		7	73	6			7	19	1			7	1	0
		8	48	4			8	30	1			8	5	0
		9	56	2			9	42	3			9	23	2
		10	42	0			10	69	3			10	25	1
		11	22	1			11	64	0			11	46	2
		12	11	0			12	42	0			12	55	3
		13	2	0			13	26	1			13	54	1
		14	1	0			14	8	1			14	47	1
		Ns or Nsa :	320	22			15	8	0			15	31	0
							16	2	0			16	19	0
							Ns or Nsa :	320	11			17	8	0
												18	4	0
												19	2	0
												Ns or Nsa :	320	10

## Sheet: Sheet B
	Total #SO3H (Nsa) per Time Step:
	Time (ps)	l = 0	l = 1	l = 2	l = 3	l = 5	l = 7	l = 10	l = 15	l = 20
	0	320	315	298	297	280	265	254	246	253
	1	320	314	296	296	276	261	251	244	250
	2	320	314	295	295	274	260	249	242	245
	3	320	314	294	291	273	257	247	238	241
	4	320	313	293	289	272	256	245	236	239
	5	320	313	293	287	270	256	242	235	236
	6	320	313	293	286	269	253	238	233	236
	7	320	312	290	284	267	250	236	230	234
	8	320	312	291	282	266	248	233	229	227
	9	320	311	291	280	265	246	229	227	225
	10	320	311	291	280	263	245	227	227	225
	11	320	311	290	278	262	242	224	224	222
	12	320	311	290	278	261	240	220	220	222
	13	320	311	289	277	260	238	217	218	220
	14	320	310	288	275	260	235	217	217	216
	15	320	310	289	274	259	232	215	216	212
	16	320	310	288	273	257	230	210	216	211
	17	320	310	286	272	256	229	207	214	208
	18	320	310	287	272	254	230	206	213	202
	19	320	309	288	272	253	227	206	209	202
	20	320	308	288	272	250	227	202	207	200
	21	320	308	287	269	246	225	202	205	199
	22	320	308	286	268	245	222	201	203	197
	23	320	308	285	268	244	218	200	199	195
	24	320	308	284	268	242	216	199	198	194
	25	320	308	283	267	242	214	198	196	190
	26	320	308	282	265	240	213	197	194	189
	27	320	308	282	264	239	211	195	193	186
	28	320	307	282	264	239	211	195	190	180
	29	320	306	279	264	239	210	195	191	179
	30	320	305	278	263	239	209	191	190	178
	31	320	305	278	261	236	208	191	190	174
	32	320	305	278	257	236	206	189	187	172
	33	320	305	278	257	236	205	188	186	172
	34	320	305	278	256	236	205	188	184	168
	35	320	305	278	255	234	205	187	180	165
	36	320	305	278	255	234	205	187	180	162
	37	320	305	276	255	233	204	187	177	157
	38	320	304	276	254	233	203	185	175	155
	39	320	304	276	253	232	202	184	173	154
	40	320	303	276	253	229	200	181	172	152
	41	320	302	276	253	229	198	181	170	152
	42	320	302	276	252	228	197	180	169	151
	43	320	302	275	251	228	194	179	169	147
	44	320	302	273	251	225	193	178	167	144
	45	320	301	270	250	225	191	177	164	143
	46	320	301	270	247	223	189	177	161	141
	47	320	301	268	247	223	187	175	159	139
	48	320	301	267	246	222	186	175	157	137
	49	320	301	267	246	221	185	175	156	137
	50	320	301	267	246	221	183	174	155	135
	51	320	300	267	247	221	182	174	153	133
	52	320	300	267	246	218	181	174	151	132
	53	320	299	267	245	216	178	173	147	131
	54	320	298	266	245	215	177	172	144	129
	55	320	298	264	245	214	176	172	141	128
	56	320	298	264	245	214	177	171	139	126
	57	320	298	263	244	214	177	170	137	126
	58	320	298	261	244	212	176	168	136	126
	59	320	297	261	243	210	172	166	136	125
	60	320	297	260	243	207	170	166	134	123
	61	320	297	260	243	207	170	165	131	121
	62	320	297	259	240	207	169	164	131	120
	63	320	297	258	239	207	168	163	128	119
	64	320	298	257	239	206	166	162	127	118
	65	320	297	258	237	203	165	162	126	117
	66	320	297	257	235	202	163	161	125	117
	67	320	296	257	234	200	162	159	125	117
	68	320	296	257	234	200	160	158	122	116
	69	320	296	256	232	200	157	156	122	115
	70	320	296	256	232	199	156	151	122	115
	71	320	295	255	232	198	154	151	120	114
	72	320	294	254	228	197	154	149	119	114
	73	320	293	253	228	197	153	147	119	113
	74	320	292	253	227	196	153	147	119	113
	75	320	292	253	225	196	152	147	119	112
	76	320	292	252	224	194	151	147	119	111
	77	320	292	252	224	193	150	147	119	110
	78	320	291	252	224	192	150	146	119	110
	79	320	291	253	223	192	150	144	119	110
	80	320	290	253	223	192	150	143	119	109
	81	320	290	253	223	192	149	143	119	109
	82	320	290	251	223	191	149	143	118	107
	83	320	290	251	222	190	148	143	118	107
	84	320	290	250	220	189	147	142	118	106
	85	320	289	250	220	188	145	142	117	106
	86	320	289	250	219	187	145	142	117	104
	87	320	287	248	219	186	145	142	115	104
	88	320	286	248	217	185	144	142	115	103
	89	320	286	248	216	185	143	142	114	102
	90	320	286	248	215	185	142	142	113	100
	91	320	286	247	215	185	142	141	112	100
	92	320	286	246	216	182	142	140	111	98
	93	320	286	245	216	182	142	140	110	97
	94	320	286	245	215	182	140	139	110	95
	95	320	286	245	213	181	138	139	107	94
	96	320	286	245	213	181	138	139	107	93
	97	320	284	245	213	181	138	138	106	92
	98	320	283	244	212	180	137	138	106	92
	99	320	283	244	210	180	137	138	106	92
	100	320	283	245	210	178	137	137	106	90
	101	320	281	245	209	177	137	137	105	89
	102	320	281	245	209	177	137	136	104	89
	103	320	281	245	209	176	137	135	103	88
	104	320	281	244	210	173	137	135	103	88
	105	320	280	244	210	174	137	134	102	88
	106	320	280	244	210	174	136	134	101	86
	107	320	280	243	210	174	135	134	99	85
	108	320	279	243	210	173	133	134	98	85
	109	320	279	242	210	171	132	133	98	84
	110	320	279	242	208	170	132	133	98	82
	111	320	280	241	207	170	132	133	98	82
	112	320	280	241	206	170	132	132	98	83
	113	320	280	240	207	169	131	132	98	83
	114	320	279	239	207	169	131	132	97	83
	115	320	278	239	207	169	131	132	95	82
	116	320	277	239	207	169	130	132	94	82
	117	320	276	239	207	168	130	131	94	82
	118	320	274	238	207	167	130	131	94	81
	119	320	275	236	206	168	130	131	93	81
	120	320	275	236	205	166	130	131	92	81
	121	320	275	236	205	166	129	131	90	81
	122	320	275	236	205	166	128	130	90	81
	123	320	275	235	205	166	128	129	90	80
	124	320	275	235	204	166	128	129	89	80
	125	320	275	233	204	166	128	129	89	80
	126	320	275	233	204	163	127	127	88	79
	127	320	275	232	204	163	127	127	88	78
	128	320	275	231	204	163	127	126	86	77
	129	320	275	231	203	163	127	126	86	77
	130	320	274	231	203	161	127	125	86	77
	131	320	274	231	203	161	127	125	86	77
	132	320	275	231	203	161	127	124	86	77
	133	320	275	231	203	160	127	124	85	77
	134	320	276	231	203	160	126	124	85	77
	135	320	275	231	203	160	125	122	84	77
	136	320	275	232	203	160	124	121	83	77
	137	320	275	232	203	160	123	120	81	76
	138	320	275	232	203	160	123	119	81	76
	139	320	275	231	203	160	122	118	81	76
	140	320	275	231	203	159	121	115	81	75
	141	320	275	231	203	159	121	115	81	75
	142	320	275	231	202	159	119	115	79	74
	143	320	275	231	202	159	119	114	79	72
	144	320	275	231	199	158	119	114	78	73
	145	320	275	231	199	156	119	114	77	72
	146	320	275	231	198	156	119	114	77	72
	147	320	275	231	199	156	119	114	77	72
	148	320	275	231	198	156	119	114	77	72
	149	320	275	231	197	156	118	113	76	72
	150	320	275	231	198	155	117	112	76	72
	151	320	275	231	198	154	117	111	76	72
	152	320	274	229	197	154	115	110	76	72
	153	320	274	229	197	154	114	109	76	71
	154	320	274	229	197	154	114	109	76	71
	155	320	274	229	197	154	114	108	76	71
	156	320	274	229	197	153	113	108	76	71
	157	320	274	229	197	153	113	107	76	71
	158	320	275	229	196	153	113	106	76	71
	159	320	275	229	196	153	113	106	76	70
	160	320	275	229	194	150	113	104	74	69
	161	320	275	229	194	150	113	103	73	69
	162	320	275	229	194	150	113	103	71	68
	163	320	275	229	194	150	113	101	71	68
	164	320	275	229	194	149	113	101	71	67
	165	320	275	229	194	149	112	101	71	67
	166	320	275	228	194	149	112	101	71	66
	167	320	275	228	194	149	111	101	70	66
	168	320	274	228	193	149	111	101	69	65
	169	320	274	228	193	148	111	101	68	63
	170	320	274	228	193	149	111	101	68	62
	171	320	274	228	193	149	111	101	68	62
	172	320	274	228	193	149	111	100	68	62
	173	320	273	229	193	147	111	99	68	62
	174	320	273	229	191	147	111	99	67	62
	175	320	273	227	190	147	111	97	67	62
	176	320	273	225	190	147	111	96	67	62
	177	320	273	225	189	147	110	96	67	62
	178	320	273	224	190	146	110	96	67	62
	179	320	272	224	190	145	110	96	67	62
	180	320	272	224	189	144	110	96	67	62
	181	320	272	224	188	144	110	96	67	62
	182	320	272	224	187	144	110	96	66	62
	183	320	271	224	187	143	109	96	66	61
	184	320	271	223	187	143	109	95	66	61
	185	320	271	223	187	143	109	94	65	61
	186	320	271	223	186	143	109	94	65	59
	187	320	271	223	186	143	109	94	65	59
	188	320	271	223	186	143	109	94	65	58
	189	320	271	223	186	143	109	92	65	58
	190	320	269	223	186	142	109	92	65	57
	191	320	269	223	186	142	109	92	65	55
	192	320	268	223	186	141	109	92	65	54
	193	320	269	223	186	141	109	92	65	54
	194	320	269	222	186	141	109	92	65	54
	195	320	269	222	185	141	107	91	65	54
	196	320	269	221	185	140	107	91	65	54
	197	320	269	222	184	140	107	91	64	54
	198	320	269	222	184	140	107	91	64	54
	199	320	269	223	183	140	107	91	63	54
	200	320	269	224	183	139	107	90	63	54
	201	320	270	223	183	139	107	90	63	54
	202	320	270	223	183	138	106	90	63	54
	203	320	270	222	183	138	106	89	63	54
	204	320	270	222	183	138	106	89	62	54
	205	320	269	222	182	138	105	89	62	54
	206	320	269	220	181	138	105	89	62	54
	207	320	269	220	181	137	105	88	62	54
	208	320	269	220	181	135	105	88	62	54
	209	320	269	220	181	135	104	88	62	54
	210	320	269	220	181	135	104	88	62	54
	211	320	269	218	181	135	104	87	61	54
	212	320	268	218	181	134	103	87	61	54
	213	320	268	218	181	133	103	87	61	54
	214	320	268	218	181	133	103	86	61	54
	215	320	268	218	181	133	103	86	61	53
	216	320	268	218	181	133	103	86	61	53
	217	320	267	218	181	134	103	86	60	53
	218	320	267	218	181	134	103	86	60	53
	219	320	266	217	181	134	103	86	60	53
	220	320	266	217	181	134	103	86	60	53
	221	320	266	217	181	132	103	85	60	52
	222	320	266	216	181	132	103	84	59	52
	223	320	266	216	180	131	102	84	59	52
	224	320	266	216	180	130	101	84	58	52
	225	320	266	216	180	130	101	84	58	52
	226	320	266	217	180	127	101	84	58	52
	227	320	266	217	180	127	101	84	58	51
	228	320	266	215	180	127	101	84	58	51
	229	320	266	215	180	127	100	84	58	50
	230	320	266	214	179	127	100	84	58	50
	231	320	266	214	179	127	100	84	57	49
	232	320	266	214	179	126	100	84	57	49
	233	320	266	214	179	126	100	84	57	49
	234	320	266	214	179	123	100	84	57	49
	235	320	266	213	179	123	100	84	57	49
	236	320	266	213	178	123	100	84	57	49
	237	320	266	213	178	123	100	84	57	49
	238	320	265	213	178	122	100	84	57	49
	239	320	265	214	178	122	100	84	57	49
	240	320	263	213	178	122	100	83	57	49
	241	320	263	212	178	121	100	82	57	49
	242	320	263	212	178	122	100	82	57	48
	243	320	263	212	178	120	100	82	56	47
	244	320	263	212	178	121	100	82	56	47
	245	320	263	212	177	121	100	82	55	47
	246	320	263	212	177	120	100	82	55	47
	247	320	261	212	175	120	100	82	55	47
	248	320	261	210	174	120	99	80	54	47
	249	320	261	210	174	120	99	79	54	47
	250	320	261	210	174	120	99	79	54	46
	251	320	261	211	174	120	99	79	54	46
	252	320	261	211	173	120	98	79	54	46
	253	320	261	210	173	119	97	79	54	46
	254	320	261	210	173	118	97	78	54	46
	255	320	261	210	173	117	96	77	54	46
	256	320	261	209	173	117	96	77	54	46
	257	320	261	208	172	117	96	77	54	46
	258	320	261	208	171	117	96	77	54	45
	259	320	261	208	171	118	96	76	53	46
	260	320	261	208	171	118	96	76	53	46
	261	320	260	208	171	118	96	76	53	46
	262	320	260	208	171	117	96	75	52	46
	263	320	261	208	171	117	96	75	52	46
	264	320	261	208	169	116	96	75	52	46
	265	320	261	208	169	116	95	75	51	46
	266	320	261	208	168	115	94	75	51	46
	267	320	261	208	167	115	94	75	51	46
	268	320	261	208	167	115	94	75	50	46
	269	320	261	208	166	115	93	75	50	46
	270	320	260	207	166	115	93	75	49	46
	271	320	260	207	167	113	93	75	49	45
	272	320	260	207	167	113	92	75	49	45
	273	320	260	207	167	112	92	74	49	45
	274	320	259	207	167	111	92	73	49	45
	275	320	259	207	167	111	91	73	49	45
	276	320	259	206	167	111	91	72	48	45
	277	320	259	206	167	110	91	72	48	45
	278	320	259	206	167	110	91	72	47	45
	279	320	259	206	167	110	91	72	47	44
	280	320	259	205	167	109	91	72	47	44
	281	320	259	205	167	109	91	71	47	44
	282	320	259	205	167	108	91	71	47	44
	283	320	259	205	167	108	91	71	47	44
	284	320	259	205	167	108	91	71	47	44
	285	320	259	205	167	108	91	71	47	44
	286	320	259	204	167	107	90	71	46	44
	287	320	259	203	167	107	90	71	46	44
	288	320	259	202	167	107	90	71	46	43
	289	320	259	202	166	107	89	71	46	43
	290	320	259	202	167	107	89	71	46	43
	291	320	259	202	166	107	89	71	46	43
	292	320	259	202	166	106	89	71	46	43
	293	320	259	202	166	106	89	69	46	43
	294	320	259	202	166	106	88	69	46	43
	295	320	259	200	166	106	88	69	46	43
	296	320	259	200	166	106	87	69	46	42
	297	320	258	200	166	105	87	69	46	42
	298	320	258	200	166	105	87	69	46	42
	299	320	257	200	166	105	87	69	46	42
	300	320	257	200	166	105	87	69	46	42
	301	320	257	200	166	105	87	69	46	42
	302	320	257	200	166	105	86	69	45	42
	303	320	257	200	166	105	86	70	45	42
	304	320	257	200	166	105	86	69	45	42
	305	320	257	200	166	105	86	69	45	42
	306	320	256	200	166	105	86	69	45	42
	307	320	257	200	166	105	86	69	45	42
	308	320	257	200	166	105	85	68	45	42
	309	320	257	200	167	105	85	68	45	42
	310	320	257	200	166	105	85	68	45	42
	311	320	257	200	166	105	85	67	45	42
	312	320	257	199	166	105	85	67	45	42
	313	320	257	198	166	105	85	66	45	42
	314	320	257	197	166	105	85	65	45	42
	315	320	257	198	165	105	85	65	45	42
	316	320	257	198	164	104	86	65	45	42
	317	320	257	198	163	104	85	65	45	42
	318	320	256	197	164	104	85	65	45	42
	319	320	256	197	164	103	85	65	44	42
	320	320	256	197	163	103	85	65	43	42
	321	320	257	197	162	102	84	65	43	42
	322	320	257	197	161	102	83	65	43	42
	323	320	257	198	161	102	83	65	43	42
	324	320	257	198	161	102	83	65	43	42
	325	320	257	198	160	102	83	64	43	42
	326	320	257	198	160	102	83	64	43	42
	327	320	256	198	160	101	83	64	43	42
	328	320	255	199	160	101	83	64	43	42
	329	320	255	199	160	101	83	63	43	42
	330	320	254	197	160	101	83	63	43	42
	331	320	254	197	159	101	83	63	43	42
	332	320	253	197	159	101	83	63	43	42
	333	320	252	197	159	101	83	63	43	42
	334	320	252	197	160	101	83	63	43	42
	335	320	251	197	160	101	83	63	43	42
	336	320	251	197	161	101	83	63	43	42
	337	320	251	197	161	101	83	63	43	42
	338	320	252	197	161	101	84	63	43	41
	339	320	252	196	161	101	84	63	43	40
	340	320	252	195	161	101	83	63	43	40
	341	320	252	195	160	101	83	63	43	40
	342	320	253	195	160	101	82	63	43	40
	343	320	253	195	160	101	82	63	43	40
	344	320	253	195	160	101	82	63	43	40
	345	320	253	195	160	100	82	63	43	40
	346	320	253	195	160	99	82	62	43	40
	347	320	253	195	160	98	82	62	43	40
	348	320	253	195	158	98	82	61	43	40
	349	320	253	196	158	98	82	61	43	40
	350	320	253	196	158	98	82	61	42	40
	351	320	253	196	159	98	82	61	42	40
	352	320	252	196	159	98	82	61	42	40
	353	320	252	196	159	98	82	61	42	40
	354	320	252	196	159	97	82	61	42	40
	355	320	252	197	158	97	82	61	42	40
	356	320	252	197	158	97	82	61	42	40
	357	320	252	197	158	97	81	61	42	39
	358	320	252	197	158	96	81	61	42	40
	359	320	252	197	158	97	81	61	42	40
	360	320	252	197	157	97	81	61	41	40
	361	320	252	197	156	97	81	61	41	40
	362	320	252	197	156	97	81	60	41	40
	363	320	253	196	156	97	81	60	41	40
	364	320	253	196	156	97	81	60	41	40
	365	320	253	196	155	96	81	60	41	40
	366	320	253	196	155	94	81	60	40	40
	367	320	253	196	155	94	81	60	40	40
	368	320	253	196	155	94	81	60	40	39
	369	320	253	196	155	94	81	60	39	39
	370	320	253	196	155	94	81	60	39	39
	371	320	253	197	155	94	82	60	39	39
	372	320	253	196	155	94	82	60	39	39
	373	320	252	196	155	94	82	60	39	39
	374	320	252	196	155	94	82	60	39	39
	375	320	252	196	155	93	82	60	39	39
	376	320	252	196	155	93	82	60	39	39
	377	320	252	196	155	93	82	60	39	39
	378	320	252	195	155	93	82	59	39	39
	379	320	252	196	155	93	82	59	39	39
	380	320	252	196	155	93	82	59	39	39
	381	320	252	196	154	93	82	59	39	39
	382	320	252	195	153	93	82	59	39	39
	383	320	252	195	152	93	82	58	39	39
	384	320	252	195	152	93	82	58	39	39
	385	320	252	196	152	93	82	58	39	39
	386	320	251	195	152	93	82	58	39	39
	387	320	251	195	152	93	82	58	39	39
	388	320	251	195	152	93	81	58	39	39
	389	320	251	195	152	93	80	58	39	39
	390	320	251	195	152	93	80	58	39	39
	391	320	251	195	152	93	80	58	39	39
	392	320	251	195	151	93	80	58	39	39
	393	320	251	195	151	93	80	58	39	39
	394	320	250	195	151	93	80	58	39	39
	395	320	250	195	151	93	80	58	38	38
	396	320	250	194	151	93	80	58	38	38
	397	320	250	194	151	93	80	58	38	38
	398	320	250	194	151	93	80	58	38	38
	399	320	250	194	151	93	80	58	38	38
	400	320	250	194	151	91	80	58	37	38
	401	320	250	194	150	91	79	58	37	38
	402	320	250	194	150	90	79	55	36	37
	403	320	250	194	149	90	79	55	36	37
	404	320	250	194	149	90	79	55	36	37
	405	320	250	194	149	90	79	55	36	37
	406	320	250	195	149	90	78	55	36	37
	407	320	250	195	149	91	78	55	36	37
	408	320	250	195	148	91	78	55	36	37
	409	320	250	195	148	91	78	55	36	37
	410	320	250	195	148	90	77	55	36	37
	411	320	250	195	148	90	77	55	36	36
	412	320	250	194	148	90	77	55	36	36
	413	320	250	193	148	90	77	55	36	36
	414	320	250	192	148	89	77	55	36	36
	415	320	251	192	147	88	76	55	36	36
	416	320	251	192	147	88	76	55	36	36
	417	320	251	192	147	88	76	55	36	36
	418	320	251	192	147	88	76	55	36	36
	419	320	251	192	147	88	76	55	36	36
	420	320	251	192	147	88	75	55	36	36
	421	320	251	192	147	88	75	55	36	36
	422	320	251	191	147	88	75	55	36	36
	423	320	250	191	148	88	75	55	36	36
	424	320	250	192	148	88	75	55	36	36
	425	320	251	191	148	88	75	55	35	36
	426	320	251	190	148	88	75	55	35	36
	427	320	251	190	148	88	75	55	35	36
	428	320	251	190	148	88	75	55	35	36
	429	320	251	190	148	88	75	55	35	35
	430	320	251	190	148	87	75	55	35	35
	431	320	251	190	148	88	75	55	35	35
	432	320	251	190	146	87	75	55	35	35
	433	320	251	190	146	87	75	55	35	35
	434	320	251	190	146	87	75	55	35	35
	435	320	251	190	146	87	75	55	35	35
	436	320	251	190	146	87	75	55	35	35
	437	320	251	190	146	87	74	55	35	35
	438	320	251	189	146	87	74	55	35	35
	439	320	249	189	147	87	74	55	35	35
	440	320	250	189	147	87	74	55	35	35
	441	320	250	189	147	86	74	55	35	35
	442	320	250	189	147	86	74	55	35	35
	443	320	250	189	147	86	74	55	35	35
	444	320	250	188	147	87	73	55	35	35
	445	320	249	187	147	87	73	55	35	35
	446	320	249	187	147	87	73	54	35	34
	447	320	249	187	147	87	73	54	35	34
	448	320	249	187	147	87	73	54	35	34
	449	320	249	187	147	87	73	54	35	34
	450	320	249	186	147	87	73	54	35	34
	451	320	249	186	147	87	72	54	35	34
	452	320	249	186	147	87	72	54	35	34
	453	320	249	186	147	87	72	54	35	34
	454	320	249	186	147	87	71	54	35	34
	455	320	249	186	147	87	71	54	35	34
	456	320	249	186	146	87	71	54	35	34
	457	320	249	186	146	87	71	54	35	34
	458	320	249	186	146	87	71	54	35	34
	459	320	250	186	146	87	71	54	35	34
	460	320	250	186	146	87	71	54	35	34
	461	320	250	186	146	87	71	54	35	34
	462	320	250	186	146	87	71	54	33	34
	463	320	250	185	146	86	71	54	33	34
	464	320	249	185	146	86	71	54	33	34
	465	320	249	185	146	85	70	54	33	34
	466	320	248	185	146	85	70	54	33	34
	467	320	248	185	146	85	70	54	33	34
	468	320	248	185	146	84	70	54	33	34
	469	320	248	184	146	84	70	54	33	34
	470	320	248	184	146	84	70	54	33	34
	471	320	248	184	145	84	70	54	33	34
	472	320	248	184	145	84	70	54	33	34
	473	320	248	185	145	84	70	54	33	34
	474	320	248	185	145	83	70	54	33	34
	475	320	249	185	146	83	70	54	33	34
	476	320	248	185	145	83	70	54	33	34
	477	320	247	186	145	84	69	54	33	33
	478	320	247	186	145	84	68	54	33	33
	479	320	247	186	145	84	69	54	33	33
	480	320	248	185	144	84	69	54	33	33
	481	320	248	185	143	84	69	54	33	33
	482	320	248	185	142	84	69	54	33	33
	483	320	248	185	142	84	69	54	33	33
	484	320	248	185	142	83	69	54	33	33
	485	320	248	184	142	83	69	54	33	33
	486	320	248	184	142	82	69	54	32	33
	487	320	248	184	142	82	69	54	32	33
	488	320	248	184	141	82	69	54	32	33
	489	320	248	185	141	82	69	54	32	33
	490	320	248	183	139	82	69	54	32	33
	491	320	248	183	139	82	69	54	32	32
	492	320	248	183	139	82	69	54	32	31
	493	320	248	182	138	82	69	54	32	31
	494	320	248	183	138	82	69	53	32	31
	495	320	248	183	138	82	69	53	32	31
	496	320	248	183	138	82	69	52	32	31
	497	320	248	183	138	82	69	52	32	31
	498	320	248	183	139	82	69	52	32	31
	499	320	247	183	139	82	69	52	32	31
	500	320	247	183	140	82	69	52	32	31
	501	320	245	183	140	82	69	52	32	31
	502	320	247	183	140	82	69	52	31	31
	503	320	246	182	139	82	69	52	31	31
	504	320	246	182	139	82	69	52	30	30
	505	320	246	182	139	82	69	52	30	30
	506	320	246	182	139	82	69	52	30	30
	507	320	245	182	139	81	69	52	30	30
	508	320	245	182	139	81	69	52	30	30
	509	320	245	182	138	80	69	51	30	30
	510	320	245	182	138	80	69	51	30	30
	511	320	245	182	138	80	69	51	29	29
	512	320	243	182	138	80	69	51	29	29
	513	320	243	182	138	80	68	51	29	29
	514	320	243	182	137	80	68	51	28	29
	515	320	243	182	137	80	67	51	28	29
	516	320	243	182	137	80	66	51	28	29
	517	320	244	182	137	80	66	51	28	29
	518	320	244	182	137	80	65	51	28	29
	519	320	244	182	138	80	65	51	28	29
	520	320	244	182	138	80	65	51	28	29
	521	320	243	182	138	79	65	50	28	28
	522	320	241	182	138	79	65	50	28	28
	523	320	241	182	138	79	65	50	28	28
	524	320	241	182	137	79	65	50	28	28
	525	320	240	182	137	79	65	50	28	28
	526	320	240	182	137	79	65	50	28	28
	527	320	240	182	137	80	65	49	28	28
	528	320	240	182	137	80	65	49	28	28
	529	320	239	182	137	80	65	49	28	28
	530	320	239	182	137	80	65	49	28	28
	531	320	239	182	137	80	65	49	28	28
	532	320	238	182	137	80	65	49	28	28
	533	320	238	182	137	80	65	49	28	28
	534	320	239	183	138	80	65	49	28	28
	535	320	239	184	138	80	64	49	28	28
	536	320	239	183	138	80	64	49	27	28
	537	320	239	183	138	80	64	49	27	28
	538	320	239	183	138	80	64	49	27	28
	539	320	239	183	138	80	64	49	27	28
	540	320	239	183	138	80	64	49	27	28
	541	320	239	183	137	80	64	49	27	28
	542	320	239	183	136	80	64	49	27	28
	543	320	239	183	136	80	64	48	27	28
	544	320	239	183	136	80	64	48	27	28
	545	320	239	183	135	80	64	48	27	27
	546	320	239	183	135	80	64	48	27	27
	547	320	239	183	135	80	64	48	27	27
	548	320	239	183	134	80	64	48	27	27
	549	320	239	183	134	80	64	48	27	27
	550	320	239	183	134	80	64	48	27	27
	551	320	239	182	134	80	64	48	27	27
	552	320	238	182	134	79	64	48	27	27
	553	320	238	182	134	79	64	48	27	27
	554	320	238	182	133	78	64	48	27	27
	555	320	238	182	133	78	64	48	27	27
	556	320	238	182	133	78	64	48	27	27
	557	320	238	182	132	78	64	48	27	26
	558	320	238	182	132	78	64	48	27	25
	559	320	238	182	132	78	64	48	27	25
	560	320	238	182	132	78	64	48	27	25
	561	320	238	182	132	78	64	48	27	25
	562	320	238	182	132	78	64	48	27	25
	563	320	237	182	131	78	63	48	27	25
	564	320	237	182	131	78	64	48	27	25
	565	320	237	181	131	78	64	48	27	25
	566	320	237	181	131	78	64	48	27	25
	567	320	237	182	131	78	64	48	27	25
	568	320	237	182	131	78	64	48	27	25
	569	320	237	182	131	78	64	48	27	25
	570	320	237	182	131	78	64	48	27	25
	571	320	237	182	131	78	64	48	27	25
	572	320	237	182	131	78	64	48	27	25
	573	320	237	182	131	78	64	48	27	25
	574	320	237	182	131	78	64	48	27	25
	575	320	237	182	131	78	64	48	27	25
	576	320	237	182	131	78	64	48	27	25
	577	320	237	182	131	78	64	48	27	25
	578	320	236	182	131	78	64	48	27	25
	579	320	236	182	131	77	64	48	27	25
	580	320	236	182	131	77	64	47	27	25
	581	320	236	182	131	77	63	47	27	25
	582	320	236	183	131	76	64	47	27	25
	583	320	237	183	131	76	64	47	27	25
	584	320	237	183	131	76	64	47	26	25
	585	320	237	183	131	76	64	47	26	25
	586	320	237	183	131	76	64	47	26	25
	587	320	237	183	131	76	64	47	26	25
	588	320	237	183	131	76	64	47	25	25
	589	320	237	183	131	76	64	47	25	25
	590	320	237	183	131	76	64	47	25	25
	591	320	238	183	131	76	63	47	25	25
	592	320	238	183	131	76	63	47	25	25
	593	320	237	183	131	76	63	47	25	25
	594	320	236	183	131	76	63	47	25	25
	595	320	236	183	131	77	63	47	25	25
	596	320	236	184	131	77	63	47	25	25
	597	320	237	184	131	77	63	47	25	25
	598	320	236	184	131	77	63	47	25	25
	599	320	236	184	131	77	63	47	25	25
	600	320	236	184	131	76	63	47	25	25
	601	320	236	184	131	76	63	47	25	25
	602	320	235	184	131	76	63	47	25	25
	603	320	235	184	131	75	63	47	25	25
	604	320	235	184	131	75	63	47	25	25
	605	320	234	183	130	75	63	47	25	25
	606	320	233	183	130	75	63	47	25	25
	607	320	233	182	130	75	63	47	25	25
	608	320	233	182	130	75	62	47	25	25
	609	320	233	179	130	75	61	47	25	25
	610	320	233	179	130	75	62	47	25	25
	611	320	233	179	129	75	61	47	25	25
	612	320	233	180	129	75	61	47	25	25
	613	320	233	179	129	74	61	47	25	25
	614	320	233	179	128	74	61	47	25	25
	615	320	234	178	128	74	61	47	25	25
	616	320	234	178	128	74	61	47	25	25
	617	320	233	178	128	74	61	47	25	25
	618	320	233	178	128	74	61	47	25	25
	619	320	233	178	128	74	60	47	25	25
	620	320	233	178	127	73	60	47	25	25
	621	320	233	178	127	73	60	46	24	25
	622	320	233	178	127	73	60	46	24	25
	623	320	233	178	127	73	60	46	24	25
	624	320	233	178	127	73	60	46	24	25
	625	320	234	178	127	74	60	46	24	25
	626	320	235	178	127	74	60	46	24	24
	627	320	235	178	127	74	60	46	24	24
	628	320	235	178	126	74	60	46	24	24
	629	320	235	178	126	74	60	46	24	24
	630	320	235	178	127	74	60	46	24	24
	631	320	235	178	127	74	60	46	24	24
	632	320	235	178	127	74	60	46	24	24
	633	320	235	178	126	74	60	46	24	24
	634	320	235	178	126	74	60	46	24	24
	635	320	236	178	125	74	60	46	24	24
	636	320	236	178	125	74	60	46	24	24
	637	320	236	177	125	74	60	46	24	24
	638	320	236	177	124	74	60	46	24	24
	639	320	237	177	124	74	60	46	24	24
	640	320	237	177	124	74	59	46	24	24
	641	320	236	177	123	73	59	46	24	24
	642	320	236	177	123	73	59	46	24	24
	643	320	236	177	123	73	59	46	24	24
	644	320	236	177	123	73	59	46	24	24
	645	320	236	177	123	73	59	46	24	24
	646	320	235	177	123	73	59	46	24	24
	647	320	235	177	123	73	59	46	24	24
	648	320	235	177	123	73	59	46	24	24
	649	320	235	177	123	73	59	46	24	24
	650	320	235	177	122	73	59	46	24	24
	651	320	235	177	122	73	59	46	24	24
	652	320	235	177	121	73	59	46	24	24
	653	320	235	177	121	73	59	46	24	24
	654	320	235	177	121	73	59	46	24	24
	655	320	234	177	121	73	59	46	24	24
	656	320	234	177	121	73	59	45	24	24
	657	320	234	177	121	73	59	45	24	24
	658	320	234	177	121	72	59	45	24	24
	659	320	235	177	121	72	59	45	24	24
	660	320	235	177	120	72	59	45	24	24
	661	320	235	176	120	72	59	45	24	24
	662	320	235	176	119	72	59	45	24	24
	663	320	234	176	119	72	58	45	24	24
	664	320	234	176	119	72	58	45	24	24
	665	320	234	176	119	72	58	45	24	24
	666	320	234	176	119	72	58	45	24	24
	667	320	234	175	119	72	58	45	24	24
	668	320	233	176	119	72	58	46	24	24
	669	320	233	175	119	72	58	45	24	24
	670	320	232	175	119	72	58	45	24	24
	671	320	233	175	119	72	58	45	24	24
	672	320	234	174	119	72	58	45	24	24
	673	320	234	174	119	72	58	45	24	24
	674	320	233	174	119	72	59	45	24	24
	675	320	233	174	119	71	59	45	24	24
	676	320	233	174	119	71	59	45	24	24
	677	320	231	174	119	71	59	45	24	24
	678	320	231	174	119	71	59	45	24	24
	679	320	231	174	120	71	59	45	24	24
	680	320	231	174	120	71	59	45	24	24
	681	320	230	174	120	71	59	45	24	24
	682	320	230	174	120	71	59	45	24	24
	683	320	230	174	120	71	59	45	24	24
	684	320	230	174	120	71	59	45	24	24
	685	320	230	174	121	72	58	45	24	24
	686	320	230	174	121	72	58	45	24	24
	687	320	230	174	122	72	58	45	24	24
	688	320	228	174	122	72	58	45	24	24
	689	320	228	174	122	72	58	45	24	24
	690	320	228	174	121	72	58	45	24	24
	691	320	228	174	121	72	56	45	24	23
	692	320	228	174	120	72	56	45	24	24
	693	320	228	174	120	72	56	45	24	24
	694	320	228	174	120	72	56	45	24	24
	695	320	230	173	119	72	56	45	24	24
	696	320	228	173	119	71	56	45	24	24
	697	320	229	173	120	71	56	45	24	24
	698	320	229	173	119	71	56	45	24	24
	699	320	229	173	119	71	56	45	24	24
	700	320	229	173	119	71	56	45	24	24
	701	320	229	173	119	71	56	45	24	24
	702	320	229	173	119	71	56	45	24	24
	703	320	228	173	118	71	56	45	24	24
	704	320	228	173	118	71	56	45	24	24
	705	320	228	173	118	71	55	45	24	24
	706	320	228	173	118	71	55	45	24	24
	707	320	227	173	118	71	55	45	24	24
	708	320	227	173	118	71	55	45	24	24
	709	320	227	173	117	71	55	45	24	24
	710	320	227	173	117	71	55	45	24	24
	711	320	227	173	117	71	55	45	24	24
	712	320	227	172	117	71	55	45	24	24
	713	320	227	171	117	72	55	45	24	24
	714	320	226	171	117	72	55	45	24	24
	715	320	226	171	117	72	55	45	24	24
	716	320	226	171	117	72	55	45	24	24
	717	320	226	170	117	72	55	45	24	24
	718	320	226	170	117	72	55	45	24	24
	719	320	226	171	117	72	54	44	24	24
	720	320	227	171	117	72	54	44	24	24
	721	320	227	171	118	72	54	44	24	24
	722	320	227	171	118	72	54	44	24	24
	723	320	227	171	118	72	54	43	24	24
	724	320	227	172	118	72	54	43	24	24
	725	320	227	172	118	72	54	43	24	24
	726	320	227	172	118	72	54	43	24	24
	727	320	226	172	118	72	54	43	24	24
	728	320	226	172	118	72	54	43	24	23
	729	320	226	172	118	72	54	42	24	23
	730	320	226	171	118	72	54	42	24	23
	731	320	226	171	118	72	54	42	24	23
	732	320	226	171	118	72	54	42	24	23
	733	320	226	171	117	72	54	42	24	23
	734	320	226	172	118	72	54	42	24	23
	735	320	226	172	118	72	54	42	24	23
	736	320	226	171	118	72	54	42	24	23
	737	320	226	171	118	72	54	42	24	23
	738	320	226	171	118	72	54	42	24	23
	739	320	224	171	118	72	54	42	24	23
	740	320	223	171	118	72	54	42	24	23
	741	320	223	172	118	72	54	42	24	23
	742	320	223	171	118	72	54	42	24	23
	743	320	223	171	118	72	54	42	24	23
	744	320	223	172	118	72	54	42	24	23
	745	320	222	171	118	72	54	42	24	23
	746	320	223	172	118	72	54	42	24	23
	747	320	222	172	118	72	54	42	24	23
	748	320	221	172	118	72	54	41	24	23
	749	320	221	172	118	72	54	41	24	23
	750	320	221	171	118	71	54	41	24	23
	751	320	221	171	118	71	54	41	24	23
	752	320	221	171	118	72	54	40	24	23
	753	320	221	171	118	72	54	40	24	23
	754	320	221	171	118	72	54	40	24	23
	755	320	222	171	118	72	54	40	24	23
	756	320	223	170	118	72	54	40	24	23
	757	320	224	170	118	72	54	40	24	23
	758	320	224	170	118	72	54	39	24	23
	759	320	224	170	118	72	54	39	24	23
	760	320	225	170	118	72	54	39	24	23
	761	320	226	170	118	72	54	39	24	23
	762	320	226	170	118	72	54	39	24	23
	763	320	225	170	118	72	54	39	24	23
	764	320	225	170	118	72	54	38	24	23
	765	320	225	170	118	72	54	38	24	23
	766	320	225	170	118	72	54	38	24	23
	767	320	225	170	118	72	54	38	24	23
	768	320	225	170	118	72	54	38	24	22
	769	320	224	170	118	72	54	38	24	21
	770	320	224	170	118	72	54	38	24	21
	771	320	224	170	118	72	54	38	24	21
	772	320	225	171	118	72	54	38	24	21
	773	320	225	171	118	72	54	38	24	21
	774	320	224	171	118	72	54	38	24	21
	775	320	224	170	118	72	54	38	24	21
	776	320	224	170	117	72	54	38	24	21
	777	320	224	169	117	72	54	37	24	21
	778	320	224	169	117	72	54	37	24	21
	779	320	225	169	117	72	54	37	24	21
	780	320	225	169	117	72	54	37	24	21
	781	320	225	169	117	71	54	37	24	21
	782	320	225	168	117	71	53	37	24	21
	783	320	225	168	117	71	53	37	24	21
	784	320	225	168	117	71	53	37	24	21
	785	320	225	168	117	71	53	37	24	21
	786	320	225	168	117	71	53	37	24	21
	787	320	225	168	117	71	53	37	24	21
	788	320	225	168	117	70	52	37	24	21
	789	320	225	168	117	70	52	37	24	21
	790	320	225	168	117	70	52	37	24	21
	791	320	225	168	117	70	52	37	24	21
	792	320	225	167	117	70	52	37	24	21
	793	320	225	167	117	70	52	37	24	21
	794	320	225	167	117	70	52	37	24	21
	795	320	225	167	117	70	52	37	24	21
	796	320	225	167	117	70	52	37	24	21
	797	320	226	167	117	70	52	37	24	21
	798	320	226	167	116	70	52	37	24	21
	799	320	225	167	116	70	52	37	24	21
	800	320	225	167	116	70	52	37	24	21
	801	320	225	166	116	70	52	37	24	21
	802	320	225	166	116	70	52	37	24	21
	803	320	225	166	115	70	52	37	24	21
	804	320	225	166	115	70	52	37	24	21
	805	320	225	166	115	70	52	37	24	21
	806	320	225	166	115	70	52	37	24	21
	807	320	224	165	116	70	52	37	24	21
	808	320	224	165	115	70	52	37	24	21
	809	320	225	165	115	70	52	37	24	21
	810	320	225	165	115	70	52	37	24	21
	811	320	225	164	115	70	52	37	24	21
	812	320	226	164	115	70	52	37	24	21
	813	320	226	165	115	70	52	37	24	20
	814	320	226	165	115	69	52	37	24	20
	815	320	226	165	115	69	52	37	24	20
	816	320	225	165	115	69	52	37	24	20
	817	320	225	165	115	69	52	37	24	20
	818	320	225	165	115	69	52	37	24	20
	819	320	225	165	115	69	52	37	24	20
	820	320	225	165	115	69	52	37	24	20
	821	320	225	165	115	69	52	37	24	20
	822	320	225	165	115	69	52	37	24	20
	823	320	225	165	115	69	51	37	24	20
	824	320	225	165	115	69	51	37	24	20
	825	320	225	165	116	69	51	37	24	20
	826	320	225	165	116	69	51	37	24	20
	827	320	225	164	116	69	51	37	24	20
	828	320	225	164	115	69	51	37	24	20
	829	320	225	164	115	70	51	37	24	20
	830	320	225	164	115	69	51	37	24	19
	831	320	225	164	115	69	51	37	24	19
	832	320	225	164	115	69	51	37	24	19
	833	320	225	164	115	69	51	37	24	19
	834	320	225	164	115	69	51	37	24	19
	835	320	225	164	115	69	51	37	24	19
	836	320	225	164	114	69	51	37	24	19
	837	320	225	163	114	69	51	37	24	19
	838	320	224	163	114	69	51	37	24	19
	839	320	224	163	114	69	51	37	24	19
	840	320	224	163	114	69	51	37	24	19
	841	320	224	163	114	69	51	37	24	19
	842	320	224	163	114	69	51	37	24	19
	843	320	224	163	114	69	51	37	24	19
	844	320	224	163	114	68	51	37	24	19
	845	320	224	163	114	68	51	37	24	19
	846	320	223	164	114	68	50	37	24	19
	847	320	224	163	114	68	50	37	24	19
	848	320	223	162	114	68	50	37	24	19
	849	320	223	162	114	67	49	37	24	19
	850	320	223	162	114	67	49	37	24	19
	851	320	223	162	114	67	49	37	24	19
	852	320	223	162	114	67	49	37	24	19
	853	320	223	162	114	67	49	37	24	19
	854	320	223	161	114	67	49	37	24	19
	855	320	223	161	114	67	49	37	24	19
	856	320	223	161	114	67	49	37	24	19
	857	320	223	161	114	67	49	37	24	19
	858	320	223	161	114	67	49	37	24	19
	859	320	223	161	114	67	49	37	24	19
	860	320	223	161	114	67	49	37	24	19
	861	320	223	161	114	67	49	37	24	19
	862	320	223	161	114	67	49	37	24	19
	863	320	223	161	114	68	49	37	24	19
	864	320	223	161	114	68	49	37	24	19
	865	320	223	161	114	68	49	36	24	19
	866	320	223	161	115	68	49	36	24	19
	867	320	223	161	115	68	49	36	24	19
	868	320	223	161	115	68	49	36	24	19
	869	320	223	161	115	68	49	36	24	19
	870	320	223	161	115	68	49	36	24	19
	871	320	223	161	115	68	49	36	23	19
	872	320	223	161	115	68	49	36	23	19
	873	320	223	161	114	68	49	36	23	19
	874	320	223	161	114	68	49	36	23	19
	875	320	222	161	114	68	49	36	23	19
	876	320	222	161	114	68	49	36	23	19
	877	320	221	161	114	68	49	36	23	19
	878	320	221	161	114	68	49	36	23	19
	879	320	221	161	114	68	49	36	23	19
	880	320	221	161	114	68	49	36	23	19
	881	320	221	161	113	68	49	36	23	19
	882	320	221	162	113	67	49	36	23	19
	883	320	221	162	113	67	49	36	23	19
	884	320	221	162	113	66	49	36	23	19
	885	320	221	162	113	66	49	36	23	19
	886	320	221	162	113	66	48	36	23	19
	887	320	222	162	113	66	48	36	23	19
	888	320	222	162	112	66	48	36	23	19
	889	320	222	161	112	66	48	36	23	19
	890	320	221	161	112	66	48	36	23	19
	891	320	221	161	112	66	48	36	23	19
	892	320	221	161	112	66	48	36	23	19
	893	320	221	161	112	66	48	36	23	19
	894	320	222	161	112	66	48	36	23	19
	895	320	222	160	112	67	48	36	23	19
	896	320	222	161	112	67	48	36	23	19
	897	320	222	162	112	67	48	36	23	19
	898	320	222	162	112	66	48	36	23	19
	899	320	222	162	112	66	48	36	23	19
	900	320	222	162	112	65	48	36	23	19
	901	320	222	162	112	65	48	36	23	19
	902	320	222	162	112	65	47	36	23	19
	903	320	222	162	112	65	47	36	23	19
	904	320	222	163	111	65	47	36	23	19
	905	320	222	163	111	65	47	36	23	19
	906	320	222	163	111	65	47	36	23	19
	907	320	222	163	111	65	47	35	23	19
	908	320	222	162	111	65	47	35	23	19
	909	320	222	162	111	65	47	35	23	19
	910	320	222	162	111	65	47	35	23	19
	911	320	222	162	111	64	47	35	23	19
	912	320	222	162	112	65	47	34	23	19
	913	320	222	162	112	65	47	34	23	18
	914	320	222	162	112	65	47	34	23	18
	915	320	222	162	112	65	47	34	23	18
	916	320	222	162	112	65	46	34	23	18
	917	320	222	162	112	65	46	34	23	18
	918	320	222	162	112	65	46	34	23	18
	919	320	221	162	111	64	46	34	23	18
	920	320	221	162	112	64	46	34	23	18
	921	320	220	162	112	64	46	34	23	18
	922	320	219	162	112	64	46	34	23	18
	923	320	219	162	112	64	46	34	23	18
	924	320	219	162	111	64	46	34	23	18
	925	320	218	162	111	64	46	34	23	18
	926	320	218	162	111	64	46	34	23	18
	927	320	217	162	111	64	46	34	23	18
	928	320	217	162	111	64	46	33	23	18
	929	320	217	162	111	64	46	33	23	18
	930	320	217	162	112	64	46	33	23	18
	931	320	216	161	111	64	46	33	23	18
	932	320	216	160	111	64	46	33	23	18
	933	320	216	160	110	64	46	33	23	18
	934	320	216	160	111	64	46	33	23	18
	935	320	216	161	111	64	46	33	23	18
	936	320	216	160	111	64	46	33	23	18
	937	320	216	160	111	64	46	33	23	18
	938	320	216	160	111	64	46	33	23	18
	939	320	216	160	111	64	46	33	23	18
	940	320	216	160	111	64	45	33	23	18
	941	320	216	160	111	64	45	33	23	18
	942	320	216	160	110	64	45	33	23	18
	943	320	216	160	110	64	45	33	23	18
	944	320	216	160	110	64	45	33	23	18
	945	320	216	160	110	64	45	33	23	18
	946	320	216	160	110	64	45	33	23	18
	947	320	216	160	110	64	45	33	23	18
	948	320	217	160	110	64	45	33	23	18
	949	320	217	161	110	64	45	33	23	18
	950	320	217	161	110	64	45	33	23	18
	951	320	217	161	110	64	45	33	23	18
	952	320	217	160	110	64	45	33	23	18
	953	320	218	160	110	64	45	33	23	18
	954	320	218	160	110	64	45	33	23	18
	955	320	217	160	110	64	45	33	23	18
	956	320	218	160	110	64	45	33	23	18
	957	320	217	160	110	64	45	33	23	18
	958	320	217	160	110	64	45	33	23	18
	959	320	217	160	110	64	45	33	23	18
	960	320	217	160	111	64	45	33	23	18
	961	320	216	160	111	64	45	33	23	18
	962	320	216	160	111	63	45	33	23	18
	963	320	216	160	111	63	45	33	23	18
	964	320	216	160	111	63	45	33	23	18
	965	320	216	160	111	63	45	33	23	18
	966	320	217	160	110	63	45	32	23	18
	967	320	217	160	110	64	45	32	23	18
	968	320	217	160	110	63	45	32	23	18
	969	320	217	160	110	63	45	32	23	18
	970	320	217	160	110	63	45	32	23	18
	971	320	217	160	110	63	45	32	23	18
	972	320	218	160	110	63	45	32	23	18
	973	320	218	160	110	63	45	32	23	18
	974	320	218	160	109	63	45	32	23	18
	975	320	219	160	109	63	45	32	23	18
	976	320	218	160	109	63	45	32	23	18
	977	320	218	160	109	63	45	32	23	18
	978	320	218	159	109	63	45	32	23	18
	979	320	218	159	109	63	45	32	23	18
	980	320	218	159	109	63	45	32	23	18
	981	320	218	159	109	63	45	32	23	18
	982	320	217	159	109	63	45	32	23	18
	983	320	217	159	109	62	45	32	23	18
	984	320	216	159	109	62	45	32	23	18
	985	320	216	160	109	62	45	32	23	18
	986	320	217	160	109	62	45	32	23	18
	987	320	216	159	110	62	45	32	23	18
	988	320	216	160	110	62	45	32	23	18
	989	320	216	160	110	62	45	32	23	18
	990	320	216	159	110	62	45	32	23	18
	991	320	216	159	110	62	45	32	23	18
	992	320	216	159	110	62	45	32	23	18
	993	320	216	159	110	62	45	32	23	18
	994	320	217	159	110	62	45	32	23	18
	995	320	217	159	110	62	45	32	23	18
	996	320	217	159	110	62	45	32	23	18
	997	320	217	159	110	62	45	31	23	18
	998	320	217	159	110	62	45	31	23	18
	999	320	217	159	110	62	45	31	23	18
	1000	320	217	159	110	61	45	31	23	18
	1001	320	217	159	110	60	45	31	23	18
	1002	320	217	159	109	60	45	31	23	18
	1003	320	216	159	109	60	45	31	23	18
	1004	320	216	159	109	60	45	31	23	18
	1005	320	216	159	109	60	45	31	23	18
	1006	320	216	159	109	60	45	31	23	18
	1007	320	217	159	109	60	45	31	23	18
	1008	320	217	159	109	60	45	31	23	18
	1009	320	217	159	109	60	45	31	23	18
	1010	320	217	159	109	60	45	31	23	18
	1011	320	217	159	109	60	45	31	23	18
	1012	320	217	158	109	60	45	31	23	18
	1013	320	217	158	109	59	45	31	23	18
	1014	320	216	159	109	59	45	31	23	18
	1015	320	216	159	109	59	45	31	23	18
	1016	320	216	159	109	59	45	31	23	18
	1017	320	216	159	109	59	45	31	23	18
	1018	320	216	159	109	59	45	31	23	18
	1019	320	216	159	109	59	45	31	23	18
	1020	320	216	159	109	59	45	31	23	18
	1021	320	216	159	109	59	45	31	23	18
	1022	320	216	159	109	59	45	31	23	18
	1023	320	217	158	109	59	45	31	23	18
	1024	320	217	158	109	59	45	31	23	18
	1025	320	218	158	108	59	45	31	23	18
	1026	320	218	159	108	59	45	31	23	18
	1027	320	218	159	108	59	45	31	23	18
	1028	320	218	159	108	59	45	31	23	18
	1029	320	218	159	108	59	45	31	23	18
	1030	320	218	158	108	59	45	31	23	18
	1031	320	218	158	108	59	45	31	23	18
	1032	320	218	158	108	59	45	31	23	18
	1033	320	218	158	108	59	45	31	23	18
	1034	320	218	158	108	59	45	31	23	18
	1035	320	218	158	108	59	45	31	23	18
	1036	320	218	157	108	59	45	31	23	18
	1037	320	217	157	108	59	45	31	23	17
	1038	320	218	157	109	59	45	31	23	17
	1039	320	217	157	109	58	45	31	23	17
	1040	320	216	157	109	58	45	31	23	17
	1041	320	216	157	109	58	44	31	23	17
	1042	320	217	157	108	57	44	31	23	17
	1043	320	217	157	108	57	44	31	23	17
	1044	320	217	157	108	56	44	31	22	17
	1045	320	217	157	107	56	44	31	22	17
	1046	320	217	157	107	56	44	31	22	17
	1047	320	217	157	107	56	44	31	22	17
	1048	320	217	157	107	56	44	31	22	17
	1049	320	217	157	107	56	44	31	22	17
	1050	320	217	157	107	56	44	31	22	17
	1051	320	217	157	107	56	44	31	22	17
	1052	320	217	157	107	56	44	31	22	17
	1053	320	217	157	107	56	44	31	22	17
	1054	320	217	157	107	56	44	31	22	17
	1055	320	217	157	107	56	44	31	22	17
	1056	320	217	157	107	56	44	31	22	17
	1057	320	217	157	107	56	44	31	22	17
	1058	320	217	157	107	56	44	31	22	17
	1059	320	217	157	107	56	44	31	22	17
	1060	320	217	157	107	56	44	31	22	17
	1061	320	217	157	106	56	44	31	22	17
	1062	320	217	157	107	56	44	31	22	17
	1063	320	217	157	107	56	44	31	22	17
	1064	320	217	157	107	56	44	31	22	17
	1065	320	217	157	107	56	44	31	22	16
	1066	320	217	157	107	56	44	31	22	16
	1067	320	217	157	107	56	44	31	22	16
	1068	320	217	157	107	56	44	31	22	16
	1069	320	217	157	107	56	44	31	22	16
	1070	320	217	157	107	56	44	31	22	16
	1071	320	217	157	106	56	44	31	22	16
	1072	320	217	157	106	56	44	30	22	16
	1073	320	216	157	106	56	44	30	22	16
	1074	320	216	157	106	55	43	30	22	16
	1075	320	216	157	106	55	43	30	22	16
	1076	320	216	157	106	55	43	30	22	16
	1077	320	216	157	106	55	42	30	22	16
	1078	320	216	157	107	55	42	30	22	16
	1079	320	216	157	106	54	42	30	22	16
	1080	320	217	157	106	54	42	30	22	16
	1081	320	217	157	106	54	42	30	22	16
	1082	320	217	157	106	54	42	30	22	16
	1083	320	217	156	106	54	42	30	22	16
	1084	320	217	156	106	54	42	30	22	16
	1085	320	217	156	106	54	42	30	22	16
	1086	320	217	156	106	54	42	30	22	16
	1087	320	217	156	106	54	42	30	22	16
	1088	320	218	156	106	54	42	30	22	16
	1089	320	218	156	106	54	42	30	22	16
	1090	320	217	156	106	54	42	30	22	16
	1091	320	218	156	106	54	42	30	22	16
	1092	320	218	156	106	54	42	30	22	16
	1093	320	218	157	106	53	42	30	22	16
	1094	320	218	157	106	53	42	30	22	16
	1095	320	218	157	106	53	42	30	22	16
	1096	320	218	157	106	53	42	30	22	16
	1097	320	218	157	106	53	42	30	22	16
	1098	320	218	157	106	53	42	30	22	16
	1099	320	218	157	106	53	42	30	22	16
	1100	320	218	157	106	52	42	30	22	16
	1101	320	218	157	106	52	42	29	22	16
	1102	320	218	157	106	52	42	29	22	16
	1103	320	217	157	106	52	42	29	22	16
	1104	320	217	157	106	52	42	29	22	16
	1105	320	217	157	106	52	42	29	22	16
	1106	320	217	157	106	52	42	29	22	16
	1107	320	217	158	106	52	42	29	22	16
	1108	320	217	158	106	52	42	29	22	16
	1109	320	217	158	107	52	42	29	22	16
	1110	320	217	158	107	52	42	29	22	16
	1111	320	217	158	107	52	42	29	22	16
	1112	320	217	158	107	52	42	29	22	16
	1113	320	218	157	107	52	42	29	22	16
	1114	320	218	157	107	52	42	29	22	16
	1115	320	218	157	107	52	42	29	22	16
	1116	320	218	157	107	52	42	29	22	16
	1117	320	218	157	107	52	42	29	22	16
	1118	320	218	157	107	52	42	29	22	16
	1119	320	218	157	107	52	42	29	21	16
	1120	320	219	157	107	52	42	29	21	16
	1121	320	219	157	107	52	42	29	21	16
	1122	320	219	156	107	52	42	29	21	16
	1123	320	219	156	107	52	42	29	22	16
	1124	320	219	156	107	52	42	29	21	16
	1125	320	219	155	107	52	42	29	21	16
	1126	320	218	156	107	52	42	29	21	16
	1127	320	218	155	107	52	42	29	21	16
	1128	320	218	155	107	52	42	29	21	16
	1129	320	218	155	107	52	42	29	21	16
	1130	320	218	155	107	52	42	29	20	16
	1131	320	218	155	107	52	42	29	20	16
	1132	320	218	155	107	52	42	29	20	16
	1133	320	218	155	107	52	42	29	20	16
	1134	320	218	155	107	52	42	29	20	16
	1135	320	218	155	107	52	42	29	20	16
	1136	320	218	155	107	52	42	29	19	16
	1137	320	218	154	107	52	42	29	19	16
	1138	320	218	154	107	52	42	29	19	16
	1139	320	218	154	107	52	42	29	19	16
	1140	320	218	154	107	52	42	29	19	16
	1141	320	219	154	107	52	42	29	19	16
	1142	320	218	154	107	52	42	29	19	16
	1143	320	218	154	107	52	42	29	19	16
	1144	320	218	154	107	52	42	29	19	16
	1145	320	218	154	107	52	42	29	19	16
	1146	320	218	154	106	52	42	29	19	16
	1147	320	217	154	106	52	42	29	19	16
	1148	320	217	154	106	52	42	29	19	16
	1149	320	217	154	106	52	42	29	19	16
	1150	320	217	154	106	52	42	29	19	16
	1151	320	217	153	106	52	41	29	19	16
	1152	320	217	153	106	52	41	29	19	16
	1153	320	217	153	106	52	41	29	19	16
	1154	320	217	153	106	52	41	29	19	16
	1155	320	217	153	106	52	41	29	19	16
	1156	320	217	153	106	52	41	29	19	16
	1157	320	217	153	106	52	41	29	19	16
	1158	320	216	153	106	52	41	29	19	16
	1159	320	216	152	106	52	41	29	19	16
	1160	320	216	153	106	52	41	29	19	16
	1161	320	216	152	106	52	41	29	19	16
	1162	320	216	152	105	52	41	29	19	16
	1163	320	216	152	105	52	41	29	19	16
	1164	320	216	152	105	52	41	29	19	16
	1165	320	216	151	105	52	41	29	19	16
	1166	320	217	151	105	52	41	29	19	16
	1167	320	216	151	105	52	41	29	19	16
	1168	320	216	151	105	52	41	29	19	16
	1169	320	216	151	105	52	41	29	19	16
	1170	320	216	152	106	52	41	29	19	16
	1171	320	216	152	106	52	41	29	19	16
	1172	320	216	152	106	52	41	29	19	16
	1173	320	217	152	106	52	41	29	19	16
	1174	320	216	152	106	52	41	29	19	16
	1175	320	216	152	106	52	41	29	19	16
	1176	320	216	152	105	52	40	29	19	16
	1177	320	216	152	105	52	40	29	19	16
	1178	320	216	152	105	52	40	29	19	16
	1179	320	216	152	105	52	40	29	19	16
	1180	320	216	152	104	52	40	29	19	16
	1181	320	216	151	104	52	40	29	19	16
	1182	320	216	151	104	52	40	29	19	16
	1183	320	216	151	104	52	40	29	19	16
	1184	320	216	151	104	52	40	29	19	16
	1185	320	216	151	104	52	40	29	18	16
	1186	320	216	151	104	52	40	29	18	16
	1187	320	216	151	104	52	40	29	18	16
	1188	320	216	151	104	52	40	29	18	16
	1189	320	216	152	104	52	40	29	18	16
	1190	320	216	152	103	52	40	29	18	16
	1191	320	216	152	103	52	40	29	18	16
	1192	320	216	153	103	52	40	29	18	16
	1193	320	216	153	103	53	40	29	18	16
	1194	320	217	153	103	52	40	29	18	16
	1195	320	217	153	103	52	40	29	18	16
	1196	320	217	153	103	52	40	29	18	16
	1197	320	217	153	103	52	40	29	18	16
	1198	320	217	153	103	52	40	29	18	16
	1199	320	217	153	103	52	40	29	18	16
	1200	320	216	154	103	52	40	29	18	16
	1201	320	216	154	103	52	40	29	18	16
	1202	320	216	154	103	52	40	29	18	16
	1203	320	215	154	103	52	40	29	18	16
	1204	320	215	154	103	52	40	29	18	16
	1205	320	215	155	103	52	40	29	18	16
	1206	320	215	155	103	52	40	29	18	16
	1207	320	215	155	103	52	40	29	18	16
	1208	320	215	155	103	52	40	29	18	16
	1209	320	215	155	103	52	40	29	18	16
	1210	320	215	155	103	52	40	29	18	16
	1211	320	215	155	103	52	40	29	18	16
	1212	320	215	155	103	52	40	29	18	16
	1213	320	215	155	103	52	40	29	18	16
	1214	320	215	155	103	52	40	29	18	16
	1215	320	215	154	103	52	40	29	18	16
	1216	320	215	154	103	52	40	29	18	16
	1217	320	215	154	103	52	40	29	18	15
	1218	320	215	154	103	52	40	29	18	15
	1219	320	215	154	103	52	40	29	18	15
	1220	320	215	154	103	52	40	29	18	15
	1221	320	215	154	103	52	40	29	18	15
	1222	320	214	154	103	52	40	29	18	15
	1223	320	214	154	103	52	40	29	18	15
	1224	320	214	154	103	52	40	29	18	15
	1225	320	214	154	103	52	40	29	18	15
	1226	320	214	155	103	52	40	29	18	15
	1227	320	214	155	103	52	40	29	18	15
	1228	320	214	155	103	52	40	29	18	15
	1229	320	214	155	103	52	40	29	18	15
	1230	320	214	155	103	52	40	29	18	15
	1231	320	214	154	103	52	40	29	18	15
	1232	320	214	154	103	52	40	29	18	15
	1233	320	214	154	103	52	40	29	18	15
	1234	320	214	153	103	52	40	29	18	15
	1235	320	215	153	103	52	40	29	18	15
	1236	320	214	153	104	52	40	29	18	15
	1237	320	214	153	104	52	40	29	18	15
	1238	320	214	153	104	52	40	29	18	15
	1239	320	214	153	104	52	40	29	18	15
	1240	320	214	153	104	52	40	29	18	15
	1241	320	214	152	104	52	40	29	18	15
	1242	320	214	152	103	52	40	29	18	15
	1243	320	214	152	103	52	40	29	18	15
	1244	320	213	152	103	52	40	29	18	15
	1245	320	213	152	103	51	40	29	18	15
	1246	320	213	152	103	51	40	29	18	15
	1247	320	213	152	103	51	40	29	18	15
	1248	320	213	152	103	51	40	29	18	15
	1249	320	213	152	103	51	40	29	18	15
	1250	320	213	152	103	52	40	28	18	15
	1251	320	214	152	103	51	40	28	18	15
	1252	320	214	152	103	51	41	28	18	15
	1253	320	215	152	103	51	40	28	18	15
	1254	320	216	152	103	51	40	28	18	15
	1255	320	216	152	103	51	40	27	18	15
	1256	320	216	152	103	51	40	27	18	15
	1257	320	216	151	104	51	40	27	18	15
	1258	320	216	151	104	51	40	27	18	15
	1259	320	216	151	104	51	40	27	18	15
	1260	320	216	151	103	51	40	27	18	15
	1261	320	215	151	103	51	40	27	18	15
	1262	320	215	151	103	51	40	27	18	15
	1263	320	215	151	103	51	40	27	18	15
	1264	320	215	151	103	51	40	27	18	15
	1265	320	215	151	103	51	40	27	18	15
	1266	320	215	150	103	51	40	27	18	15
	1267	320	215	150	103	51	40	27	18	15
	1268	320	215	150	103	51	40	27	18	15
	1269	320	215	150	103	51	40	27	17	15
	1270	320	215	150	103	51	40	27	17	15
	1271	320	215	150	103	51	40	27	17	15
	1272	320	215	150	103	51	40	27	17	15
	1273	320	215	150	103	51	40	27	17	15
	1274	320	215	150	103	51	40	27	17	15
	1275	320	215	150	103	51	40	27	17	15
	1276	320	215	150	103	51	40	27	17	15
	1277	320	215	151	103	51	40	27	17	15
	1278	320	215	151	102	51	40	27	17	15
	1279	320	215	151	102	51	40	27	17	15
	1280	320	214	151	102	51	40	27	17	15
	1281	320	213	151	102	51	40	27	17	15
	1282	320	213	151	102	51	40	27	17	15
	1283	320	213	151	102	51	40	27	17	15
	1284	320	213	152	102	51	40	27	17	15
	1285	320	212	152	102	50	40	27	17	15
	1286	320	212	152	102	50	40	27	17	15
	1287	320	212	152	102	50	40	27	17	15
	1288	320	212	152	102	50	40	27	17	15
	1289	320	212	152	102	50	40	27	17	15
	1290	320	212	152	101	50	40	27	17	15
	1291	320	213	152	101	50	40	27	17	15
	1292	320	211	152	101	50	40	27	17	15
	1293	320	211	152	101	50	40	27	17	15
	1294	320	212	152	101	50	40	27	17	15
	1295	320	212	152	101	50	40	27	17	15
	1296	320	212	152	101	50	40	27	17	15
	1297	320	212	152	100	50	40	27	17	15
	1298	320	213	153	100	50	40	27	17	15
	1299	320	213	152	100	50	41	27	17	15
	1300	320	213	152	100	50	41	27	17	15
	1301	320	214	152	100	50	41	27	17	15
	1302	320	214	152	100	50	41	27	17	15
	1303	320	214	152	100	50	41	27	17	15
	1304	320	214	152	100	50	41	27	17	15
	1305	320	214	152	100	50	41	27	17	15
	1306	320	214	152	100	50	41	27	17	15
	1307	320	214	152	100	50	41	27	17	15
	1308	320	214	152	100	50	41	27	17	15
	1309	320	214	152	100	50	41	27	16	15
	1310	320	214	151	100	50	41	27	16	15
	1311	320	214	151	100	50	41	27	16	15
	1312	320	214	151	100	50	41	27	16	15
	1313	320	214	151	100	50	40	27	16	15
	1314	320	214	151	100	50	39	27	16	15
	1315	320	213	151	100	50	39	27	16	15
	1316	320	213	151	100	50	39	27	16	15
	1317	320	213	151	100	50	39	27	16	15
	1318	320	214	151	100	50	39	27	16	15
	1319	320	214	151	100	50	39	27	16	15
	1320	320	214	151	100	50	39	27	16	15
	1321	320	214	151	100	50	39	27	16	15
	1322	320	214	151	99	50	39	27	16	15
	1323	320	214	151	99	50	39	27	16	15
	1324	320	214	151	99	50	39	27	16	15
	1325	320	214	151	99	50	39	27	16	15
	1326	320	214	151	99	50	39	27	16	15
	1327	320	215	151	99	50	39	27	16	15
	1328	320	215	151	99	50	39	27	16	15
	1329	320	215	151	99	50	39	27	16	15
	1330	320	215	151	99	50	38	27	16	15
	1331	320	215	151	99	50	38	27	16	15
	1332	320	215	152	99	50	38	27	16	15
	1333	320	215	152	99	50	38	27	16	15
	1334	320	215	152	99	49	38	27	16	15
	1335	320	215	152	98	49	38	27	16	15
	1336	320	215	152	98	49	38	27	16	15
	1337	320	215	152	97	49	38	27	16	15
	1338	320	215	152	97	49	38	27	16	15
	1339	320	215	152	97	49	38	27	16	15
	1340	320	215	152	97	49	38	27	16	15
	1341	320	216	152	97	49	38	27	16	15
	1342	320	216	152	97	49	38	27	16	15
	1343	320	215	152	97	49	38	27	16	15
	1344	320	215	152	98	49	38	27	16	15
	1345	320	215	152	98	49	38	27	16	15
	1346	320	216	152	98	49	38	27	16	15
	1347	320	216	152	98	49	38	27	16	15
	1348	320	216	152	98	49	38	27	16	15
	1349	320	215	151	98	49	38	27	16	15
	1350	320	215	151	98	49	38	27	16	15
	1351	320	216	151	98	49	38	27	16	15
	1352	320	216	151	98	49	38	27	16	15
	1353	320	216	151	98	49	38	27	16	15
	1354	320	216	151	98	49	38	27	16	15
	1355	320	216	151	98	49	38	27	16	15
	1356	320	216	151	97	49	38	27	16	15
	1357	320	216	151	97	49	38	27	16	15
	1358	320	216	151	97	49	38	27	16	15
	1359	320	216	150	97	49	38	27	16	15
	1360	320	216	150	97	49	38	27	16	15
	1361	320	215	150	97	49	38	26	16	15
	1362	320	215	150	97	49	38	26	16	15
	1363	320	215	150	97	49	38	26	16	15
	1364	320	215	150	97	49	38	26	16	15
	1365	320	215	150	98	49	38	26	16	15
	1366	320	215	150	97	49	38	26	16	15
	1367	320	214	150	97	49	38	26	16	15
	1368	320	214	150	97	49	38	26	16	15
	1369	320	214	150	97	49	38	26	16	15
	1370	320	214	150	97	49	38	26	16	15
	1371	320	214	150	97	49	38	26	16	15
	1372	320	214	150	97	49	38	26	16	15
	1373	320	215	150	97	49	38	26	15	15
	1374	320	216	150	97	49	38	26	15	15
	1375	320	215	150	96	49	38	26	15	15
	1376	320	215	150	96	49	38	26	15	15
	1377	320	215	150	96	49	38	26	15	15
	1378	320	215	150	96	49	38	26	15	15
	1379	320	215	150	96	49	38	26	15	15
	1380	320	216	150	96	49	38	26	15	15
	1381	320	216	150	96	49	38	26	15	15
	1382	320	216	150	96	49	38	26	15	15
	1383	320	216	150	96	49	38	26	15	15
	1384	320	216	150	96	49	38	26	15	15
	1385	320	216	150	96	49	38	26	15	15
	1386	320	215	150	96	49	38	26	15	15
	1387	320	215	149	96	49	38	26	15	15
	1388	320	215	149	96	49	38	26	15	14
	1389	320	215	149	96	49	38	26	15	14
	1390	320	216	149	96	49	38	26	15	14
	1391	320	215	149	96	49	38	26	15	14
	1392	320	215	149	96	49	38	26	15	14
	1393	320	217	149	96	49	38	26	15	14
	1394	320	217	149	96	49	38	26	15	14
	1395	320	217	149	96	49	38	26	15	14
	1396	320	216	149	96	49	38	26	15	14
	1397	320	216	149	97	49	38	26	15	14
	1398	320	216	149	96	48	38	26	15	14
	1399	320	216	149	96	48	38	26	15	14
	1400	320	217	149	96	48	38	26	15	14
	1401	320	217	149	96	48	38	26	15	14
	1402	320	217	149	96	48	38	26	15	14
	1403	320	219	150	95	48	38	26	15	14
	1404	320	219	150	95	48	38	26	15	14
	1405	320	219	150	95	48	38	26	15	14
	1406	320	219	149	95	48	38	26	15	14
	1407	320	219	149	95	48	38	26	15	14
	1408	320	219	149	95	48	38	26	15	14
	1409	320	219	149	95	48	38	26	15	14
	1410	320	219	149	95	48	38	26	15	14
	1411	320	219	149	95	48	38	26	15	14
	1412	320	219	149	95	48	37	26	15	14
	1413	320	219	149	95	48	37	26	15	14
	1414	320	219	149	95	48	37	26	15	14
	1415	320	219	149	94	48	37	26	15	14
	1416	320	218	149	94	48	37	26	14	14
	1417	320	218	149	94	48	37	26	14	14
	1418	320	218	148	94	48	37	26	14	14
	1419	320	217	148	94	48	37	26	14	14
	1420	320	217	148	94	48	37	26	14	14
	1421	320	217	148	94	47	37	26	14	14
	1422	320	217	147	94	47	37	26	14	14
	1423	320	216	147	94	47	37	26	14	14
	1424	320	216	147	94	47	37	26	14	14
	1425	320	216	147	95	47	37	26	14	14
	1426	320	216	147	94	47	37	26	14	14
	1427	320	216	147	94	47	37	26	14	14
	1428	320	217	147	94	47	37	26	14	13
	1429	320	217	147	94	47	37	26	14	13
	1430	320	217	147	94	47	37	26	14	13
	1431	320	217	147	94	47	37	26	14	13
	1432	320	217	147	93	47	37	26	14	13
	1433	320	217	147	93	47	37	26	14	13
	1434	320	217	147	93	47	37	26	14	13
	1435	320	218	147	93	47	37	26	14	13
	1436	320	218	147	93	47	37	26	14	13
	1437	320	217	147	93	47	37	26	14	13
	1438	320	217	147	93	47	37	26	14	13
	1439	320	217	147	93	47	36	26	14	13
	1440	320	217	147	93	47	36	26	14	13
	1441	320	217	147	93	47	36	26	14	13
	1442	320	217	147	93	47	36	26	14	13
	1443	320	217	147	93	47	36	26	14	13
	1444	320	217	147	93	47	36	26	14	13
	1445	320	217	147	93	47	36	26	14	13
	1446	320	217	147	93	47	36	26	14	13
	1447	320	217	146	93	47	36	26	14	13
	1448	320	216	146	93	47	36	26	14	13
	1449	320	216	146	93	47	36	26	14	13
	1450	320	216	146	93	47	36	26	14	13
	1451	320	216	146	93	47	36	26	14	13
	1452	320	216	146	93	47	36	26	14	13
	1453	320	216	146	94	47	36	26	14	13
	1454	320	216	145	94	47	36	26	14	13
	1455	320	216	145	94	47	36	26	14	13
	1456	320	216	145	94	47	36	26	14	13
	1457	320	216	145	94	47	36	26	14	13
	1458	320	216	145	94	47	36	26	14	13
	1459	320	216	145	94	47	36	26	14	13
	1460	320	216	144	94	47	36	26	14	13
	1461	320	216	144	94	47	36	26	14	13
	1462	320	216	144	94	47	36	26	14	13
	1463	320	216	144	94	47	36	26	14	13
	1464	320	217	144	94	47	36	26	14	13
	1465	320	217	144	93	47	36	26	14	13
	1466	320	217	144	93	47	36	26	14	13
	1467	320	217	144	93	47	36	26	14	13
	1468	320	217	144	93	47	35	26	14	13
	1469	320	217	144	93	47	35	26	14	13
	1470	320	217	144	93	47	35	26	14	13
	1471	320	217	144	93	47	35	26	14	13
	1472	320	217	144	93	47	35	26	14	13
	1473	320	217	144	93	46	35	26	14	13
	1474	320	217	144	93	46	35	26	14	13
	1475	320	217	144	93	46	35	26	14	13
	1476	320	217	144	93	46	35	26	14	13
	1477	320	216	144	93	46	35	26	14	13
	1478	320	216	144	93	46	35	26	14	13
	1479	320	216	144	93	46	35	26	14	13
	1480	320	216	144	93	46	35	26	14	13
	1481	320	216	144	93	46	35	26	14	13
	1482	320	216	144	93	46	35	26	14	13
	1483	320	216	144	93	46	35	26	14	13
	1484	320	216	144	93	46	35	26	14	13
	1485	320	216	144	93	46	35	26	14	13
	1486	320	216	144	93	46	35	26	14	13
	1487	320	216	144	93	46	35	26	14	13
	1488	320	216	144	93	46	35	26	14	13
	1489	320	216	144	93	46	35	26	14	13
	1490	320	216	144	93	46	35	26	14	13
	1491	320	216	144	93	46	35	26	14	13
	1492	320	216	144	93	46	35	26	14	13
	1493	320	216	144	93	46	35	26	14	13
	1494	320	215	144	93	46	35	26	14	13
	1495	320	215	144	93	46	35	26	14	13
	1496	320	215	145	93	46	35	26	14	13
	1497	320	215	144	93	46	35	26	14	13
	1498	320	215	144	93	46	35	26	14	13
	1499	320	215	144	93	46	35	26	14	13
	1500	320	215	144	93	46	34	26	14	13
	1501	320	215	144	93	46	34	25	14	13
	1502	320	215	144	93	46	34	25	14	13
	1503	320	215	143	93	46	34	25	14	13
	1504	320	215	143	93	46	34	25	14	13
	1505	320	215	143	93	46	34	25	14	13
	1506	320	215	143	93	47	34	25	14	13
	1507	320	215	143	93	46	34	25	14	13
	1508	320	216	143	93	46	34	25	14	13
	1509	320	216	143	93	46	34	25	14	13
	1510	320	216	143	93	46	33	25	14	13
	1511	320	216	142	93	46	33	25	14	13
	1512	320	216	142	93	46	33	25	14	13
	1513	320	216	142	93	46	33	25	14	13
	1514	320	216	142	93	46	33	25	14	13
	1515	320	216	142	92	46	33	25	14	13
	1516	320	216	142	92	46	33	25	14	13
	1517	320	216	142	92	46	33	25	14	13
	1518	320	216	142	92	46	33	25	14	13
	1519	320	216	142	92	46	33	25	14	13
	1520	320	215	142	92	46	33	25	14	13
	1521	320	216	142	92	46	33	25	14	13
	1522	320	216	143	91	46	33	25	14	13
	1523	320	216	143	91	46	33	25	14	13
	1524	320	216	143	91	46	33	25	14	13
	1525	320	216	143	91	46	33	25	14	13
	1526	320	216	143	90	46	33	25	14	13
	1527	320	216	143	90	46	33	25	14	13
	1528	320	216	143	90	46	33	25	14	13
	1529	320	216	143	90	46	33	25	14	13
	1530	320	217	143	90	46	33	25	14	13
	1531	320	216	143	90	46	33	25	14	13
	1532	320	216	143	91	45	33	25	14	13
	1533	320	217	143	91	45	33	25	14	13
	1534	320	215	142	91	46	33	25	14	11
	1535	320	215	142	91	45	33	25	14	11
	1536	320	215	142	91	45	33	25	14	11
	1537	320	215	143	91	45	33	25	14	11
	1538	320	215	143	91	45	33	25	14	11
	1539	320	215	143	91	45	33	25	14	11
	1540	320	215	143	91	45	33	25	14	11
	1541	320	215	143	91	45	33	25	14	11
	1542	320	215	144	91	45	33	25	14	11
	1543	320	215	144	91	45	33	25	14	11
	1544	320	215	144	90	45	33	25	14	11
	1545	320	215	144	90	45	33	25	14	10
	1546	320	215	144	90	45	33	25	14	10
	1547	320	216	144	89	45	33	25	14	10
	1548	320	216	144	89	45	33	25	14	10
	1549	320	216	144	89	45	33	25	14	10
	1550	320	216	144	89	45	33	25	14	10
	1551	320	216	144	89	45	33	25	14	10
	1552	320	216	144	89	45	33	25	14	10
	1553	320	216	144	89	45	33	25	14	10
	1554	320	216	144	89	45	33	25	14	10
	1555	320	216	142	88	45	33	25	14	10
	1556	320	216	142	88	45	33	25	14	10
	1557	320	216	142	88	45	33	25	14	10
	1558	320	216	142	88	45	33	25	14	10
	1559	320	216	142	88	45	33	25	14	10
	1560	320	215	143	88	45	33	25	14	10
	1561	320	215	143	88	45	33	25	14	10
	1562	320	215	143	88	45	33	25	14	10
	1563	320	215	143	88	45	33	25	14	10
	1564	320	216	143	88	45	33	25	14	10
	1565	320	216	143	88	45	33	25	14	10
	1566	320	215	143	88	45	33	25	14	10
	1567	320	215	143	88	44	33	25	14	10
	1568	320	215	143	88	44	33	25	14	10
	1569	320	215	143	88	44	33	25	14	10
	1570	320	215	143	88	44	33	25	14	10
	1571	320	215	143	88	44	33	25	14	10
	1572	320	215	143	88	44	33	25	14	10
	1573	320	216	142	89	44	33	25	14	10
	1574	320	217	142	88	44	33	25	14	10
	1575	320	216	142	88	44	33	25	14	10
	1576	320	216	142	88	44	33	25	14	10
	1577	320	216	141	88	44	33	25	14	10
	1578	320	216	141	88	44	33	25	14	10
	1579	320	215	141	88	44	33	25	14	10
	1580	320	214	140	88	44	33	25	14	10
	1581	320	214	141	88	44	33	25	14	10
	1582	320	214	141	88	44	33	25	14	10
	1583	320	214	141	88	44	33	25	14	10
	1584	320	214	141	88	43	33	25	14	10
	1585	320	214	140	87	43	33	25	14	10
	1586	320	214	140	87	44	33	25	14	10
	1587	320	214	140	87	44	33	25	14	10
	1588	320	214	140	87	44	33	25	14	10
	1589	320	214	140	88	44	33	25	14	10
	1590	320	215	140	88	44	33	25	14	10
	1591	320	216	140	88	44	33	25	14	10
	1592	320	216	140	88	44	33	25	14	10
	1593	320	217	140	88	44	33	25	14	10
	1594	320	217	140	88	44	33	25	14	10
	1595	320	217	140	88	44	33	25	14	10
	1596	320	217	140	89	44	33	25	14	10
	1597	320	217	140	89	44	33	25	14	10
	1598	320	218	140	89	44	33	25	14	10
	1599	320	218	140	89	44	33	25	14	10
	1600	320	218	140	88	44	33	25	14	10
	1601	320	218	141	88	44	33	25	14	10
	1602	320	218	140	88	44	33	25	14	10
	1603	320	218	139	88	44	33	25	14	10
	1604	320	218	139	88	44	33	25	14	10
	1605	320	218	139	88	44	33	25	14	10
	1606	320	218	139	88	44	33	25	14	10
	1607	320	218	139	88	44	33	25	14	10
	1608	320	218	139	87	44	33	25	14	10
	1609	320	218	139	87	44	33	25	14	10
	1610	320	218	139	87	44	33	25	14	10
	1611	320	218	139	87	44	33	25	14	10
	1612	320	218	139	87	44	33	25	14	10
	1613	320	218	139	87	44	33	25	14	10
	1614	320	218	139	87	44	33	25	14	10
	1615	320	218	139	87	44	33	25	14	10
	1616	320	218	139	87	44	33	25	14	10
	1617	320	218	139	87	44	33	25	14	10
	1618	320	218	139	88	44	33	25	14	10
	1619	320	218	139	88	44	33	25	14	10
	1620	320	218	139	88	44	33	25	14	10
	1621	320	218	139	86	44	32	25	14	10
	1622	320	218	139	87	44	32	25	14	10
	1623	320	218	138	87	44	31	25	14	10
	1624	320	217	138	88	44	31	25	14	10
	1625	320	217	138	88	44	31	25	14	10
	1626	320	218	138	88	44	31	25	14	10
	1627	320	218	138	88	44	31	25	14	10
	1628	320	218	138	86	44	31	25	14	10
	1629	320	218	138	86	44	31	25	14	10
	1630	320	218	138	86	44	32	24	14	10
	1631	320	218	137	86	44	32	24	14	10
	1632	320	218	137	86	44	32	24	14	10
	1633	320	218	137	86	44	32	24	14	10
	1634	320	218	138	86	44	32	24	14	10
	1635	320	218	138	86	44	32	24	14	10
	1636	320	218	138	86	44	32	24	14	10
	1637	320	218	138	86	44	32	24	14	10
	1638	320	218	138	86	44	32	24	14	10
	1639	320	218	138	86	44	32	24	14	10
	1640	320	218	138	86	44	32	24	14	10
	1641	320	218	138	86	45	32	24	14	10
	1642	320	218	138	86	44	32	24	14	10
	1643	320	218	138	86	44	32	24	14	10
	1644	320	218	138	86	44	32	24	14	10
	1645	320	218	138	86	44	32	24	14	10
	1646	320	218	138	86	44	32	24	14	10
	1647	320	218	138	86	44	32	24	14	10
	1648	320	218	139	86	44	32	24	14	10
	1649	320	218	139	86	44	32	24	14	10
	1650	320	218	139	87	44	32	24	14	10
	1651	320	218	139	87	44	32	24	14	10
	1652	320	218	139	87	44	32	24	14	10
	1653	320	218	139	87	44	32	24	14	10
	1654	320	217	138	87	44	32	24	14	10
	1655	320	217	138	87	43	32	24	14	10
	1656	320	217	138	87	43	32	24	14	10
	1657	320	217	138	87	43	32	24	14	10
	1658	320	217	138	87	43	32	24	14	10
	1659	320	217	138	87	43	32	23	14	10
	1660	320	217	137	87	43	32	23	14	10
	1661	320	217	137	86	43	32	23	14	10
	1662	320	217	137	86	43	32	23	14	10
	1663	320	217	136	86	43	32	23	14	10
	1664	320	218	136	86	43	32	23	14	10
	1665	320	217	136	86	43	32	23	14	10
	1666	320	217	136	86	43	32	23	14	10
	1667	320	217	136	86	43	32	23	14	10
	1668	320	217	136	86	43	32	23	14	10
	1669	320	217	136	86	42	32	23	14	10
	1670	320	217	136	86	42	32	23	14	10
	1671	320	217	136	86	42	32	23	14	10
	1672	320	217	136	86	42	32	23	14	10
	1673	320	217	136	86	42	32	23	14	10
	1674	320	217	136	86	42	32	23	14	10
	1675	320	217	136	86	42	32	23	14	10
	1676	320	217	136	86	42	32	23	14	10
	1677	320	217	136	87	42	32	23	14	10
	1678	320	217	136	87	42	32	23	14	10
	1679	320	217	137	87	42	32	23	14	10
	1680	320	217	137	87	42	32	23	14	10
	1681	320	217	137	87	42	32	23	14	10
	1682	320	217	137	87	42	32	23	14	10
	1683	320	217	138	87	42	32	23	14	10
	1684	320	218	137	87	42	32	23	14	10
	1685	320	216	137	87	42	32	23	14	10
	1686	320	216	137	87	42	32	23	14	10
	1687	320	216	137	87	42	32	23	14	10
	1688	320	216	137	87	42	32	23	14	10
	1689	320	216	138	87	42	32	23	14	10
	1690	320	217	138	87	42	32	23	14	10
	1691	320	217	138	87	42	32	23	14	10
	1692	320	217	138	87	42	32	23	14	10
	1693	320	217	138	87	42	32	23	14	10
	1694	320	217	138	87	42	32	23	14	10
	1695	320	217	138	87	42	32	23	14	10
	1696	320	217	138	87	42	32	23	14	10
	1697	320	217	138	87	42	32	23	14	10
	1698	320	217	138	87	42	32	23	14	10
	1699	320	217	138	87	42	32	23	14	10
	1700	320	217	138	87	42	32	23	14	10
	1701	320	217	138	87	42	32	23	14	10
	1702	320	217	138	87	42	32	23	14	10
	1703	320	217	138	87	42	32	23	14	10
	1704	320	217	138	87	42	32	23	14	10
	1705	320	217	138	87	42	32	23	14	10
	1706	320	217	138	87	42	32	23	14	10
	1707	320	217	138	87	42	32	23	14	10
	1708	320	217	138	87	42	32	23	14	10
	1709	320	217	138	87	42	32	23	14	10
	1710	320	217	138	87	42	32	23	14	10
	1711	320	217	138	87	42	32	23	14	10
	1712	320	217	138	87	42	32	23	14	10
	1713	320	217	138	87	42	32	23	14	10
	1714	320	217	138	87	42	32	23	14	10
	1715	320	217	138	88	42	32	23	14	10
	1716	320	217	138	88	42	32	23	14	10
	1717	320	217	138	88	42	32	23	14	10
	1718	320	217	138	88	42	32	23	14	10
	1719	320	217	138	88	42	32	23	14	10
	1720	320	217	138	88	42	32	23	14	10
	1721	320	217	138	88	42	32	23	14	10
	1722	320	217	138	88	42	32	23	14	10
	1723	320	217	139	88	42	32	23	14	10
	1724	320	217	138	88	42	32	23	14	10
	1725	320	217	138	88	42	32	23	14	10
	1726	320	216	138	87	42	32	23	14	10
	1727	320	216	138	87	42	32	23	14	10
	1728	320	216	138	87	42	32	23	14	10
	1729	320	216	138	87	42	32	23	14	10
	1730	320	216	138	87	42	32	23	14	10
	1731	320	216	137	87	42	31	23	14	10
	1732	320	216	137	87	42	31	23	14	10
	1733	320	216	137	87	42	31	23	14	10
	1734	320	216	137	87	42	31	23	14	10
	1735	320	216	137	87	42	31	23	14	10
	1736	320	216	137	87	42	31	23	14	10
	1737	320	216	137	87	42	31	23	14	10
	1738	320	216	137	87	42	31	23	14	10
	1739	320	216	137	87	42	31	23	14	10
	1740	320	216	137	87	42	31	23	14	10
	1741	320	216	137	87	42	31	23	14	10
	1742	320	216	137	86	42	31	23	14	10
	1743	320	216	137	86	42	31	23	14	10
	1744	320	216	137	86	42	31	23	14	10
	1745	320	216	137	86	42	31	23	14	10
	1746	320	216	137	86	42	31	23	14	10
	1747	320	216	137	87	42	31	23	14	10
	1748	320	216	137	86	42	31	23	14	10
	1749	320	216	137	86	42	31	23	14	10
	1750	320	216	136	86	42	31	23	14	10
	1751	320	216	136	86	42	31	23	14	10
	1752	320	216	136	86	42	31	23	14	10
	1753	320	216	137	86	42	31	23	14	10
	1754	320	216	137	86	42	31	23	14	10
	1755	320	216	137	86	42	31	23	14	10
	1756	320	216	137	86	42	31	23	14	10
	1757	320	215	137	86	42	31	22	14	10
	1758	320	215	137	86	42	31	22	13	10
	1759	320	215	137	86	42	31	22	13	10
	1760	320	215	137	86	42	31	22	13	10
	1761	320	215	137	86	42	31	22	13	10
	1762	320	215	137	86	42	31	22	13	10
	1763	320	215	137	86	42	31	22	13	10
	1764	320	215	137	86	42	31	22	13	10
	1765	320	215	137	85	42	31	22	13	10
	1766	320	215	137	85	42	31	22	13	10
	1767	320	215	137	85	42	31	22	13	10
	1768	320	215	137	85	42	31	22	13	10
	1769	320	215	137	85	42	31	22	13	10
	1770	320	215	137	85	42	31	22	13	10
	1771	320	216	137	85	42	31	22	13	10
	1772	320	215	137	85	42	31	22	13	10
	1773	320	215	137	85	42	31	22	13	10
	1774	320	215	136	85	42	30	22	13	10
	1775	320	215	136	85	42	30	22	13	10
	1776	320	216	136	85	42	30	22	13	10
	1777	320	215	136	85	42	30	22	13	10
	1778	320	215	137	85	42	30	22	13	10
	1779	320	215	137	85	42	30	22	13	10
	1780	320	215	137	85	42	30	22	13	10
	1781	320	215	137	85	42	30	22	13	10
	1782	320	215	137	85	42	30	22	13	10
	1783	320	215	138	85	42	30	22	13	10
	1784	320	214	138	85	42	30	22	13	10
	1785	320	214	138	85	42	30	22	13	10
	1786	320	214	138	85	42	30	22	13	10
	1787	320	214	138	85	42	30	22	13	10
	1788	320	214	138	85	42	30	22	13	10
	1789	320	214	137	84	42	30	22	13	10
	1790	320	214	137	84	42	30	22	13	10
	1791	320	214	137	84	42	30	22	13	10
	1792	320	214	137	84	42	30	22	13	10
	1793	320	214	137	84	42	30	22	13	10
	1794	320	214	137	84	42	30	22	13	10
	1795	320	214	137	84	42	30	22	13	10
	1796	320	214	137	84	41	30	22	13	10
	1797	320	214	137	84	41	30	22	13	10
	1798	320	214	137	84	41	30	22	13	10
	1799	320	214	137	84	41	30	22	13	10
	1800	320	214	137	84	41	30	22	13	10
	1801	320	213	137	84	41	30	22	13	10
	1802	320	213	137	84	41	30	22	13	10
	1803	320	213	137	84	41	30	22	13	10
	1804	320	213	136	84	41	30	22	13	10
	1805	320	213	137	84	41	30	22	13	10
	1806	320	214	137	84	40	30	22	13	10
	1807	320	215	137	84	40	30	22	13	10
	1808	320	215	137	84	40	30	22	13	10
	1809	320	215	137	84	40	30	22	13	10
	1810	320	215	137	84	40	30	22	13	10
	1811	320	215	137	83	40	30	22	13	10
	1812	320	215	137	83	40	30	22	13	10
	1813	320	215	137	83	40	30	22	13	10
	1814	320	215	137	83	40	30	22	13	10
	1815	320	215	137	83	40	30	22	13	10
	1816	320	215	137	83	40	30	22	13	10
	1817	320	215	137	83	41	30	22	13	10
	1818	320	215	137	83	41	30	22	13	10
	1819	320	216	137	83	41	30	22	13	10
	1820	320	215	137	84	41	30	22	13	10
	1821	320	215	137	84	41	30	22	13	10
	1822	320	215	137	84	41	30	22	13	10
	1823	320	215	137	84	41	30	22	13	10
	1824	320	215	137	84	41	30	22	13	10
	1825	320	215	136	83	41	30	22	13	10
	1826	320	214	136	83	40	30	22	13	10
	1827	320	214	136	83	40	30	22	13	10
	1828	320	214	136	83	40	30	22	13	10
	1829	320	214	136	83	40	30	22	13	10
	1830	320	214	136	83	40	30	22	13	10
	1831	320	214	136	83	40	30	22	13	10
	1832	320	214	136	83	40	30	22	13	10
	1833	320	214	136	83	40	30	22	13	10
	1834	320	214	136	83	40	30	22	13	10
	1835	320	214	136	83	40	30	22	13	10
	1836	320	214	136	83	40	30	22	13	10
	1837	320	214	136	83	40	30	22	13	10
	1838	320	214	136	83	40	30	22	13	10
	1839	320	214	136	83	40	30	22	13	10
	1840	320	214	136	82	40	30	22	13	10
	1841	320	214	137	82	40	30	22	13	10
	1842	320	214	136	82	40	30	22	13	10
	1843	320	214	136	82	40	30	22	13	10
	1844	320	214	136	82	40	30	22	13	10
	1845	320	214	136	82	40	30	22	13	10
	1846	320	214	136	82	40	30	22	13	10
	1847	320	214	136	82	40	30	22	13	10
	1848	320	214	136	82	40	30	22	13	10
	1849	320	214	136	82	40	30	22	13	10
	1850	320	215	136	82	40	30	22	13	10
	1851	320	215	136	82	40	30	22	13	10
	1852	320	215	136	82	40	30	22	13	10
	1853	320	215	136	82	41	30	22	13	10
	1854	320	215	136	82	40	30	22	13	10
	1855	320	215	136	82	40	30	22	13	10
	1856	320	215	136	82	40	30	22	13	10
	1857	320	215	136	82	40	30	22	13	10
	1858	320	215	136	82	40	30	22	13	10
	1859	320	215	136	82	40	30	22	13	10
	1860	320	216	136	82	40	30	22	13	10
	1861	320	216	136	82	40	30	22	13	10
	1862	320	216	136	82	40	30	22	13	10
	1863	320	216	136	82	40	30	22	13	10
	1864	320	216	136	82	40	30	22	13	10
	1865	320	216	136	82	40	30	22	13	10
	1866	320	217	136	82	40	30	22	13	10
	1867	320	217	136	82	40	30	22	13	10
	1868	320	217	136	82	40	30	22	13	10
	1869	320	217	136	82	40	30	22	13	10
	1870	320	217	135	82	40	30	22	12	10
	1871	320	217	135	82	40	30	22	12	10
	1872	320	217	136	82	40	30	22	12	10
	1873	320	217	136	82	40	30	22	12	10
	1874	320	216	136	82	40	30	22	12	10
	1875	320	216	136	82	40	30	22	12	10
	1876	320	216	136	82	40	30	22	12	10
	1877	320	216	136	82	40	30	22	12	10
	1878	320	216	136	82	40	30	22	12	10
	1879	320	216	136	82	40	30	22	12	10
	1880	320	216	136	82	40	30	22	12	10
	1881	320	216	136	82	40	30	22	12	10
	1882	320	216	136	82	39	30	22	12	10
	1883	320	215	136	82	39	30	22	12	10
	1884	320	215	136	82	39	30	22	12	10
	1885	320	214	136	82	39	30	22	12	10
	1886	320	215	136	82	39	30	22	12	10
	1887	320	215	136	82	39	30	22	12	10
	1888	320	215	136	82	39	30	22	12	10
	1889	320	215	136	82	39	30	22	12	10
	1890	320	215	136	82	39	30	22	12	10
	1891	320	215	136	82	39	30	22	12	10
	1892	320	215	136	82	39	30	22	12	10
	1893	320	216	136	82	39	30	22	12	10
	1894	320	216	136	82	39	30	22	12	10
	1895	320	216	136	82	39	30	22	12	10
	1896	320	216	136	81	39	30	22	12	10
	1897	320	216	136	81	39	30	22	12	10
	1898	320	216	136	81	39	30	22	12	10
	1899	320	215	136	81	39	30	22	12	10
	1900	320	216	136	81	39	30	22	12	10
	1901	320	216	136	81	39	30	22	12	10
	1902	320	216	136	81	39	30	22	12	10
	1903	320	216	136	81	39	30	22	12	10
	1904	320	216	135	81	39	30	22	12	10
	1905	320	216	135	81	39	30	22	12	10
	1906	320	216	135	81	39	30	22	12	10
	1907	320	216	135	81	39	30	22	12	10
	1908	320	215	135	81	39	30	22	12	10
	1909	320	215	135	81	39	30	22	12	10
	1910	320	215	135	81	39	30	22	12	10
	1911	320	215	135	81	39	30	22	12	10
	1912	320	215	135	81	39	30	22	12	10
	1913	320	216	135	81	39	30	22	12	10
	1914	320	216	135	81	39	30	22	12	10
	1915	320	216	135	81	39	30	22	12	10
	1916	320	216	135	81	39	30	22	12	10
	1917	320	216	135	81	39	30	22	12	10
	1918	320	216	135	81	39	30	22	12	10
	1919	320	216	135	81	39	30	22	12	10
	1920	320	216	134	81	39	30	22	12	10
	1921	320	216	134	81	39	30	22	12	10
	1922	320	216	134	81	39	30	22	12	10
	1923	320	216	134	81	39	30	22	12	10
	1924	320	216	134	81	39	30	22	12	10
	1925	320	216	134	81	39	30	22	12	10
	1926	320	216	134	81	39	30	22	12	10
	1927	320	216	135	81	39	30	22	12	10
	1928	320	216	135	81	39	30	22	12	10
	1929	320	216	135	81	39	30	22	12	10
	1930	320	216	136	81	39	30	22	12	10
	1931	320	216	136	81	39	30	22	12	10
	1932	320	216	136	81	39	30	22	12	10
	1933	320	216	136	81	39	30	22	12	10
	1934	320	215	134	81	39	30	22	12	10
	1935	320	215	134	81	39	30	22	12	10
	1936	320	215	134	81	39	30	22	12	10
	1937	320	214	134	81	39	30	22	12	10
	1938	320	214	134	80	39	30	22	12	10
	1939	320	215	134	80	39	30	22	12	10
	1940	320	215	134	80	39	30	22	12	10
	1941	320	215	134	80	39	30	22	12	10
	1942	320	215	134	80	39	30	22	12	10
	1943	320	215	134	80	39	30	22	12	10
	1944	320	215	134	80	39	30	22	12	10
	1945	320	215	133	80	39	30	22	12	10
	1946	320	215	133	80	39	30	22	12	10
	1947	320	215	133	80	39	30	22	12	10
	1948	320	215	133	80	39	30	22	12	10
	1949	320	215	134	80	39	30	22	12	10
	1950	320	215	133	80	39	30	22	12	10
	1951	320	215	133	80	39	30	22	12	10
	1952	320	215	133	80	39	30	22	12	10
	1953	320	215	133	80	39	30	22	12	10
	1954	320	215	133	80	39	30	22	12	10
	1955	320	215	133	80	39	30	22	12	10
	1956	320	215	133	80	39	30	22	12	10
	1957	320	215	133	80	39	30	22	12	10
	1958	320	215	133	80	39	30	22	12	10
	1959	320	215	133	80	39	30	22	12	10
	1960	320	215	133	80	39	30	22	12	10
	1961	320	215	133	80	39	30	22	12	10
	1962	320	215	133	80	39	30	22	12	10
	1963	320	215	133	80	39	30	22	11	10
	1964	320	215	133	80	39	30	22	11	10
	1965	320	215	133	80	39	30	22	11	10
	1966	320	215	133	80	39	30	22	11	10
	1967	320	215	134	80	39	30	22	11	10
	1968	320	215	134	80	39	30	22	11	10
	1969	320	214	134	80	39	30	22	11	10
	1970	320	214	134	80	39	30	22	11	10
	1971	320	214	134	80	39	30	22	11	10
	1972	320	214	134	80	39	30	22	11	10
	1973	320	214	134	80	39	30	22	11	10
	1974	320	214	134	80	39	30	22	11	10
	1975	320	214	134	80	39	30	22	11	10
	1976	320	214	135	80	39	30	22	11	10
	1977	320	214	136	80	39	30	22	11	10
	1978	320	214	136	80	39	30	22	11	10
	1979	320	214	136	80	39	30	22	11	10
	1980	320	214	136	80	39	30	22	11	10
	1981	320	214	136	80	39	30	22	11	10
	1982	320	214	136	80	39	30	22	11	10
	1983	320	214	136	80	39	30	22	11	10
	1984	320	214	136	80	39	30	22	11	10
	1985	320	214	136	80	39	30	22	11	10
	1986	320	214	136	80	39	30	22	11	10
	1987	320	215	137	80	39	30	22	11	10
	1988	320	214	137	80	39	30	22	11	10
	1989	320	214	137	80	39	30	22	11	10
	1990	320	214	137	80	39	30	22	11	10
	1991	320	214	137	80	39	30	22	11	10
	1992	320	214	137	80	39	30	22	11	10
	1993	320	214	137	80	39	30	22	11	10
	1994	320	214	137	80	39	30	22	11	10
	1995	320	214	137	80	39	30	22	11	10
	1996	320	214	137	80	39	30	22	11	10
	1997	320	214	137	80	39	29	22	11	10
[truncated: 3 more rows]
